# 1 Polymorphisms in immunoglobulin heavy chain variable genes and 2 their upstream regions

3

4 Ivana Mikocziova<sup>1†\*</sup>, Moriah Gidoni<sup>2†</sup>, Ida Lindeman<sup>1</sup>, Ayelet Peres<sup>2</sup>, Omri Snir<sup>1</sup>, Gur Yaari<sup>2‡</sup>, Ludvig M.  
5 Sollid<sup>1†</sup>

6

7 <sup>1</sup> K.G.Jebsen Centre for Celiac Disease Research and Department of Immunology, University of Oslo  
8 and Oslo University Hospital, 0372 Oslo, Norway

9 <sup>2</sup> Faculty of Engineering, Bar Ilan University, Ramat Gan 5290002, Israel

10 † Joint First Authors

11 ‡ Joint Last Authors

12 \* To whom correspondence should be addressed. Email: [ivana.mikocziova@medisin.uio.no](mailto:ivana.mikocziova@medisin.uio.no)

13

## 14 ABSTRACT

15 Germline variations in immunoglobulin genes influence the repertoire of B cell receptors and  
16 antibodies, and such polymorphisms may impact disease susceptibility. However, the knowledge of  
17 the genomic variation of the immunoglobulin loci is scarce. Here, we report 25 novel germline *IGHV*  
18 alleles as inferred from rearranged naïve B cell cDNA repertoires of 98 individuals. Thirteen novel  
19 alleles were selected for validation, out of which ten were successfully confirmed by targeted  
20 amplification and Sanger sequencing of non-B cell DNA. Moreover, we detected a high degree of  
21 variability upstream of the V-region in the 5'UTR, leader 1, and leader 2 sequences, and found that  
22 identical V-region alleles can differ in upstream sequences. Thus, we have identified a large genetic  
23 variation not only in the V-region but also in the upstream sequences of *IGHV* genes. Our findings  
24 challenge current approaches used for annotating immunoglobulin repertoire sequencing data.

25

26 Immunoglobulins are an important part of the adaptive immune system. They exert their function  
27 either as the antigen receptor of B cells that is essential for the antigen presentation capacity of these  
28 cells, or as secreted antibodies that survey extracellular fluids of the body. Immunoglobulins can bind  
29 a plethora of antigen epitopes via their paratopes, which are composed of combinations of heavy and  
30 light chain's variable regions. A huge diversity of paratopes is established by recombination of  
31 variable (V), diversity (D) (not in light chains) and joining (J) genes, and the pairing of heavy and light  
32 chains<sup>1</sup>. There is a large number of V, D, and J genes present on the heavy chain locus (chromosome  
33 14, 14q32.33)<sup>2</sup> as well as the two light chain loci kappa (chromosome 2, 2p11.2) and lambda  
34 (chromosome 22, 22q11.2)<sup>3</sup>.

35 These loci remain incompletely characterized due to the fact that they contain many repetitive  
36 sequence segments with many duplicated genes<sup>4</sup>, which makes it difficult to correctly assemble short  
37 reads from whole genome sequencing. Single nucleotide polymorphisms as well as copy number  
38 variations are in linkage disequilibrium and make up distinct haplotypes<sup>4</sup>. To this date, a limited  
39 number of genomically sequenced<sup>5-7</sup> and inferred<sup>8,9</sup> haplotypes of the heavy chain and the two light  
40 chain loci have been described. Different databases exist for genomic immune receptor DNA  
41 sequences (IMGT/GENE-DB<sup>10</sup>), putative novel variants from inferred data (IgPdb<sup>11</sup>) or entire immune  
42 receptor repertoires (OGRDB<sup>12</sup>).

43 The usage of immunoglobulin heavy chain variable (*IGHV*) genes and their mutational status are most  
44 frequently studied in relation to cancer<sup>13,14</sup>, responses to vaccines<sup>15,16</sup>, or in autoimmune diseases<sup>17-19</sup>.  
45 Most *IGHV* genes have several allelic variants and more alleles are being discovered as a result of  
46 adaptive immune receptor repertoire-sequencing (AIRR-seq)<sup>20,21</sup>. Software tools such as TIgGER<sup>22,23</sup>,  
47 IgDiscover<sup>24</sup> and partis<sup>25</sup> allow to infer germline alleles from such repertoire data. Based on these  
48 inferred alleles, the data can then be input to other tools that infer haplotypes and repertoire  
49 deletions<sup>26</sup>. Incorrect annotation could possibly lead to inferring wrong deletions and biased  
50 assessments. Therefore, having a full overview of germline variants is essential for studying the  
51 adaptive immune response with high accuracy.

52 Some allelic variants have been associated with increased disease susceptibility<sup>27,28</sup>, yet the impact of  
53 immunoglobulin gene variation on disease risks is still unknown<sup>29</sup>. These regions have not been  
54 sufficiently covered in the numerous genome wide association studies performed to date. More  
55 comprehensive maps of polymorphisms are required for proper analysis.

56 Here, we have used previously generated AIRR-seq data<sup>30</sup> from naïve B-cells of 98 Norwegian  
57 individuals to identify novel *IGHV* alleles, a selection of which we then validated from genomic DNA  
58 (gDNA) of non-B cells, i.e. T cells and monocytes. We also analyzed the sequences upstream of the  
59 V-region, and constructed consensus sequences for the upstream variants present in the cohort.  
60 These results expand our knowledge of this important locus and deepen our understanding of allelic  
61 diversity within the Caucasian population. In addition, the result of this study can be used to improve  
62 the accuracy of currently used bioinformatics tools for the analysis of immunoglobulin repertoire  
63 sequencing data.

64

## 65 **RESULTS**

66 In this study, we used an AIRR-seq dataset from a cohort of 98 individuals<sup>30</sup> aiming to characterize  
67 novel *IGHV* alleles that might be present in the data, as well as analyze the sequences upstream of  
68 the V-region and create a table of previously unexplored upstream variants (Fig.1). To validate our  
69 inferences from the AIRR-seq data analysis, genomic DNA of the same individuals was isolated from  
70 non-B cells, i.e. T cells and monocytes. The reason for using non-B cells for validation was to avoid  
71 capturing sequences with somatic hypermutation that occurs in primed B cells.

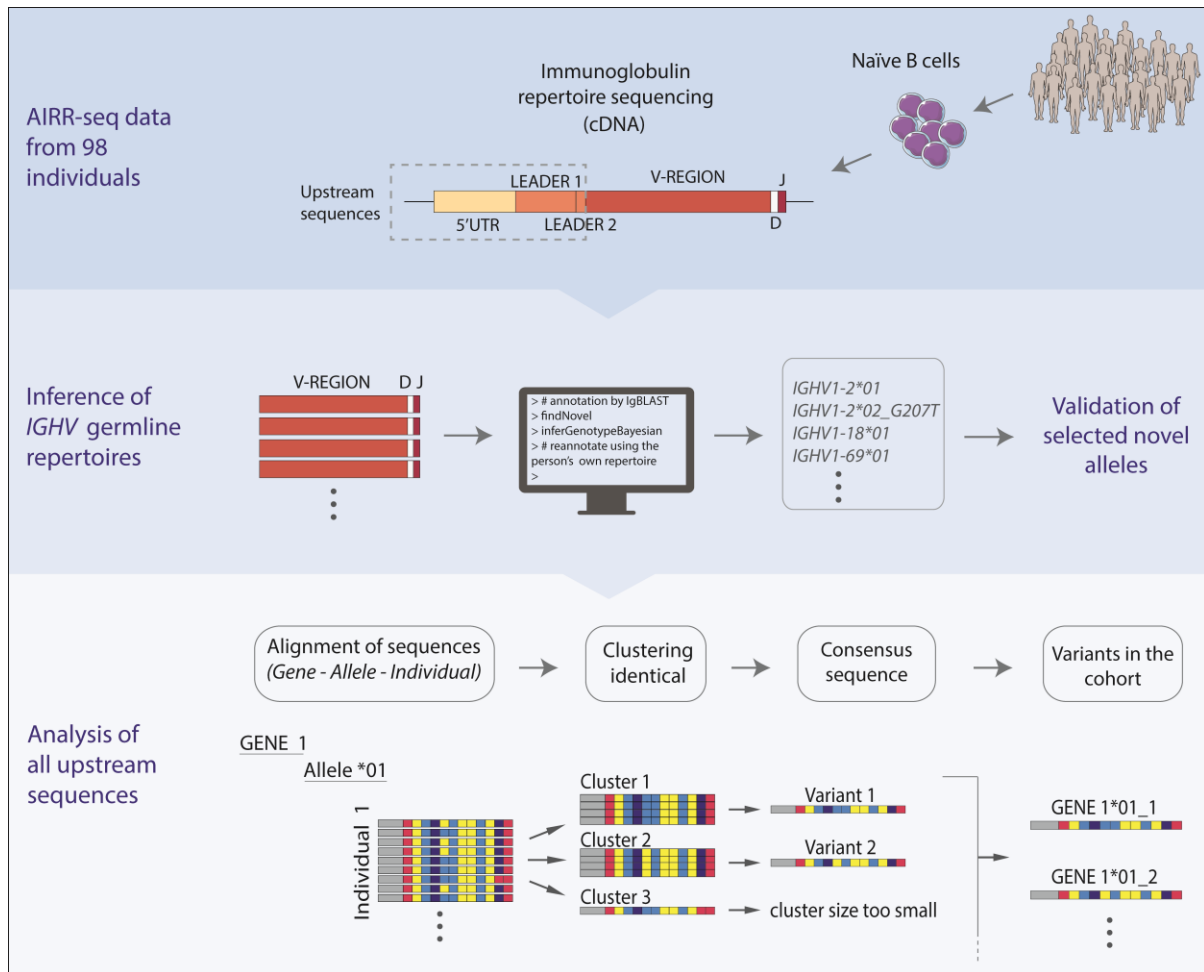

72

73 **Figure 1. Schematic representation of the data analysis.** In this study, we used material from a Norwegian  
 74 cohort of 98 individuals<sup>30</sup>. Following the initial preprocessing of the data, we inferred the germline V-gene  
 75 repertoires of all individuals in the cohort and identified novel alleles using the software suites TIGGER and  
 76 IgDiscover. The availability of genomic DNA of the same individuals allowed us to verify some of our findings  
 77 from the analysis of the AIRR-seq data. Since the validation attempts revealed polymorphisms outside of the V-  
 78 region, we decided to analyze the upstream sequences, i.e. 5'UTR, leader 1 and leader 2. We used a custom  
 79 approach for this analysis based on clustering identical variants. More details about the protocols and analysis  
 80 can be found in the methods section.

81 We used two germline inference tools, TIGGER<sup>22,23</sup> and IgDiscover<sup>24</sup>, to characterize novel alleles and  
 82 to create a personalized germline reference of *IGHV* alleles for each individual (aka genotype). The  
 83 purpose of using two different software tools was to increase our confidence in the inference of novel  
 84 alleles. This study does not aim to serve as a comparison of the available software tools.

85 To increase the overlap between the different software results and to allow the discovery of novel  
 86 alleles in genes with low expression, we adjusted selected TIGGER parameters, while keeping the  
 87 IgDiscover parameters as default. Suspected false positive signals were filtered out from the novel  
 88 allele candidates using mismatch frequency as described in Methods. The mismatch frequencies are  
 89 depicted in Supplementary Fig.1. Novel allele candidates that were determined to be false positives  
 90 contained mutations A152G, T154G and A85C (Supplementary Fig.1).

91

## 92 **Analysis of the V-region reveals 25 novel *IGHV* alleles**

93 We first analyzed the usage of all genes and the different alleles carried by individuals in the cohort.  
94 The relative usage of certain genes appeared to be strongly affected by the alleles present in the  
95 inferred genotype. This was true for *IGHV1-2*, *IGHV1-46*, *IGHV3-11*, *IGHV3-43*, *IGHV3-48*, *IGHV3-53*,  
96 *IGHV4-61*, and *IGHV5-51* (Supplementary Fig.2). Overview of the usage of all genes across all  
97 individuals can be found in Supplementary Fig.2-3.

98 We inferred altogether 25 novel alleles (Fig.2), and we named them using the closest reference allele.  
99 The majority of the novel alleles (22) were identified both with TIgGER and IgDiscover. In addition to  
100 these, two novel alleles were found exclusively by IgDiscover, and one novel allele was found  
101 exclusively by TIgGER.

102 Thirteen novel alleles were selected for validation by targeted amplification and subsequent Sanger  
103 sequencing of gDNA (Supplementary Fig.4) of non-B cells, i.e. T cells and monocytes isolated by  
104 fluorescence-activated cell sorting<sup>30</sup>. The validation primers are specified in the Supplementary Table  
105 1. Out of those thirteen alleles, ten were successfully validated. These include *IGHV1-2\*02\_G207T*,  
106 *IGHV1-3\*01\_T35A*, *IGHV1-46\*01\_C213G*, *IGHV1-69\*01\_C243T*, *IGHV3-7\*03\_G144A*, *IGHV3-*  
107 *9\*01\_T307C*, *IGHV3-20\*01\_C307T*, *IGHV3-21\*01\_C255T*, *IGHV3-64\*05\_G265C*, and *IGHV3-*  
108 *64D\*06\_G258T*. Surprisingly, *IGHV3-64\*05\_G265C* was found to originate from *IGHV3-64D* (Fig.6c).  
109 Two of the novel alleles, namely *IGHV1-46\*01\_C213G* and *IGHV3-20\*01\_C307T*, have been recently  
110 added to the IMGT database as *IGHV1-46\*04* and *IGHV3-20\*04* respectively.

111 Validation of the novel alleles revealed additional polymorphisms outside of the V-region. The allele  
112 *IGHV3-64\*06\_G258T* has a polymorphism in leader 1 (position -21) in addition to the V-region  
113 polymorphism. Genomic validation of *IGHV3-7\*03\_G144A* revealed a further polymorphism in the  
114 intron. During validation of this allele, we also managed to amplify the genomic sequence of *IGHV3-*  
115 *7\*02*, which carried the previously reported polymorphism A318G<sup>31</sup>. This polymorphism was not  
116 inferred from the AIRR-seq data in our study, since the default parameters of the inference tools are  
117 set to detect polymorphisms up to position 312.

118 Attempts to validate *IGHV4-39\*07\_C288A*, *IGHV4-61\*02\_A234G*, and *IGHV6-1\*01\_T91C* were  
119 unsuccessful. The gene-specific primers that were used for validation were designed based on the  
120 current reference genome. However, the efficiency of the *IGHV4* primers was inferior, and Sanger  
121 sequencing only revealed allele \*01 of each gene, even in clearly heterozygous individuals.

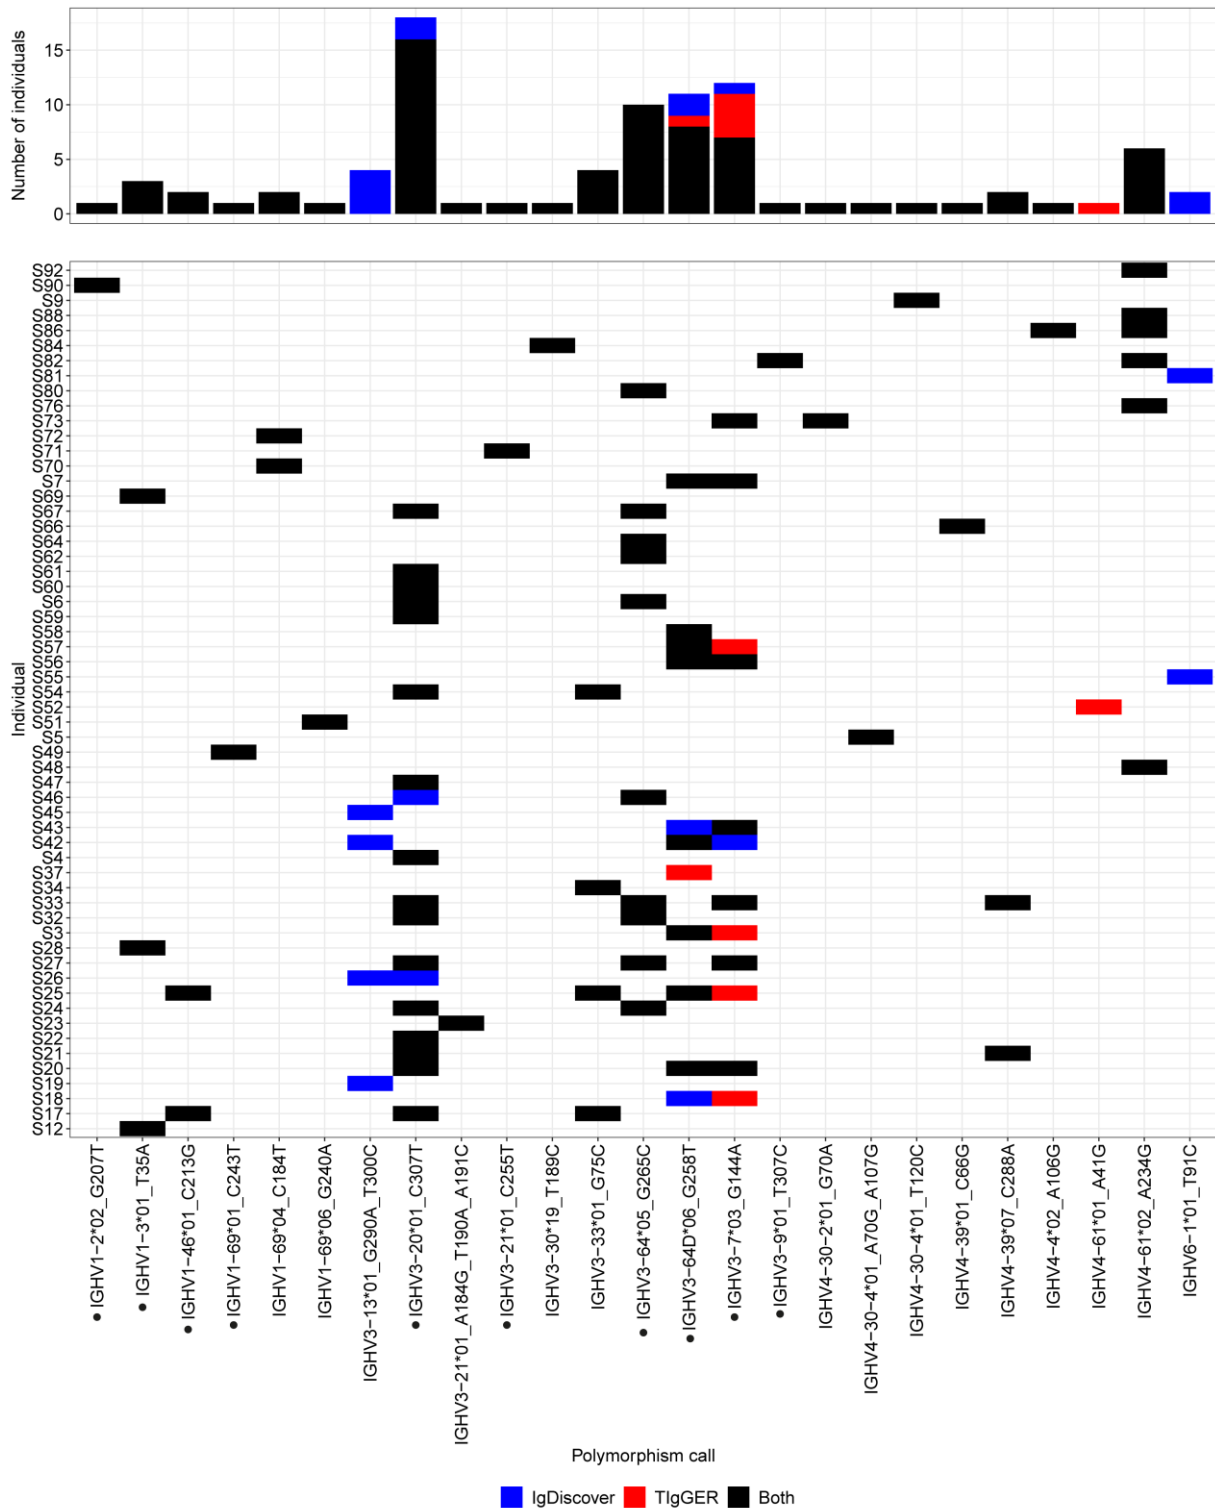

122

123 **Figure 2. Novel IGHV alleles.** The software suites TlgGER and IgDiscover were used to infer a personal IGHV  
 124 genotype for each individual and to infer previously undiscovered alleles. All novel alleles that are part of a  
 125 genotype inferred by at least one of the methods appear on the x-axis. Alleles that were validated by Sanger  
 126 sequencing are marked with a dot. Individuals with at least one novel allele lie on the y-axis and are labelled by  
 127 their subject name. For each allele, the color of a tile (or a bar) represents the method of detection and  
 128 genotype inference. The height of each bar on top represents the number of individuals for whom a certain  
 129 allele was inferred and is part of a genotype.

130 **Analysis of upstream sequences yields a more complete and accurate germline reference**  
131 **dataset**

132 As some of the validated novel alleles had additional polymorphisms in the intron or the leader  
133 sequence, we extended our analysis of the AIRR-seq data beyond the V-region. Although introns are  
134 not present in the AIRR-seq data, the sequences of the 5' untranslated region (5'UTR), leader 1, and  
135 leader 2 lie upstream of the V-region and are present in the data thanks to the library preparation  
136 method (Fig.1). We will refer to 5'UTR, leader 1, and leader 2 collectively as upstream sequences.

137 We decided to use the genotyped AIRR-seq data to characterize upstream sequence variants for all  
138 genes and alleles. To extract the upstream sequences, we removed the VDJ and constant regions,  
139 while keeping the original sequence's V-region annotation. Sequences from each individual were  
140 processed separately. We observed slight variations in the length of 5'UTRs assigned to the same  
141 gene. It is important to have matching length for clustering, as different lengths could mean that  
142 identical sequences would not cluster together. To overcome this issue, for each gene we trimmed  
143 the ends of 5' ends of the upstream sequences to match the most frequent length. We then took the  
144 trimmed upstream sequences with the same allele annotation and clustered them. Each cluster of a  
145 sufficient size gave rise to one consensus upstream sequence. This process was repeated for all  
146 genes and alleles across all individuals. Finally, consensus sequences from all individuals were  
147 combined to create an upstream germline reference dataset of the cohort (Fig.3). The number of  
148 individuals carrying each of the variants is shown in Supplementary Fig.5.

149 According to the constructed germline reference dataset, the lengths of leader 1 (45 nt) and leader 2  
150 (10 nt) sequences appear to be well conserved across most genes, with the exception of *IGHV3-*  
151 *64\*01* and *IGHV6-1\*01* (Fig.3). The leader 1 sequences of these two genes are 3 nt longer, which  
152 makes the position of ATG appear to be shifted upstream. The length of the 5'UTR is relatively  
153 conserved within the same gene family, however, there is a large variability across different families.  
154 Genes of the *IGHV2* family have the shortest 5'UTR, while the 5'UTRs of *IGHV3* genes are the  
155 longest.

156 Comparison of the consensus sequences in the cohort with the reference sequences obtained from  
157 the IMGT/GENE-DB<sup>10</sup> revealed some discrepancies between our data and the reference database.  
158 For example, the IMGT reference sequence of the allele *IGHV5-51\*01* has T at position -3 in leader 2,  
159 while the reference sequences of the other reference alleles have G at this position. However, in our  
160 data, all *IGHV5-51* alleles have G at position -3, as illustrated in Fig.3. Our observation of G at  
161 position -3 in *IGHV5-51\*01* was validated by targeted amplification and Sanger-sequencing of *IGHV5-*  
162 *51\*01* from a homozygous individual (Supplementary Fig.6).

163

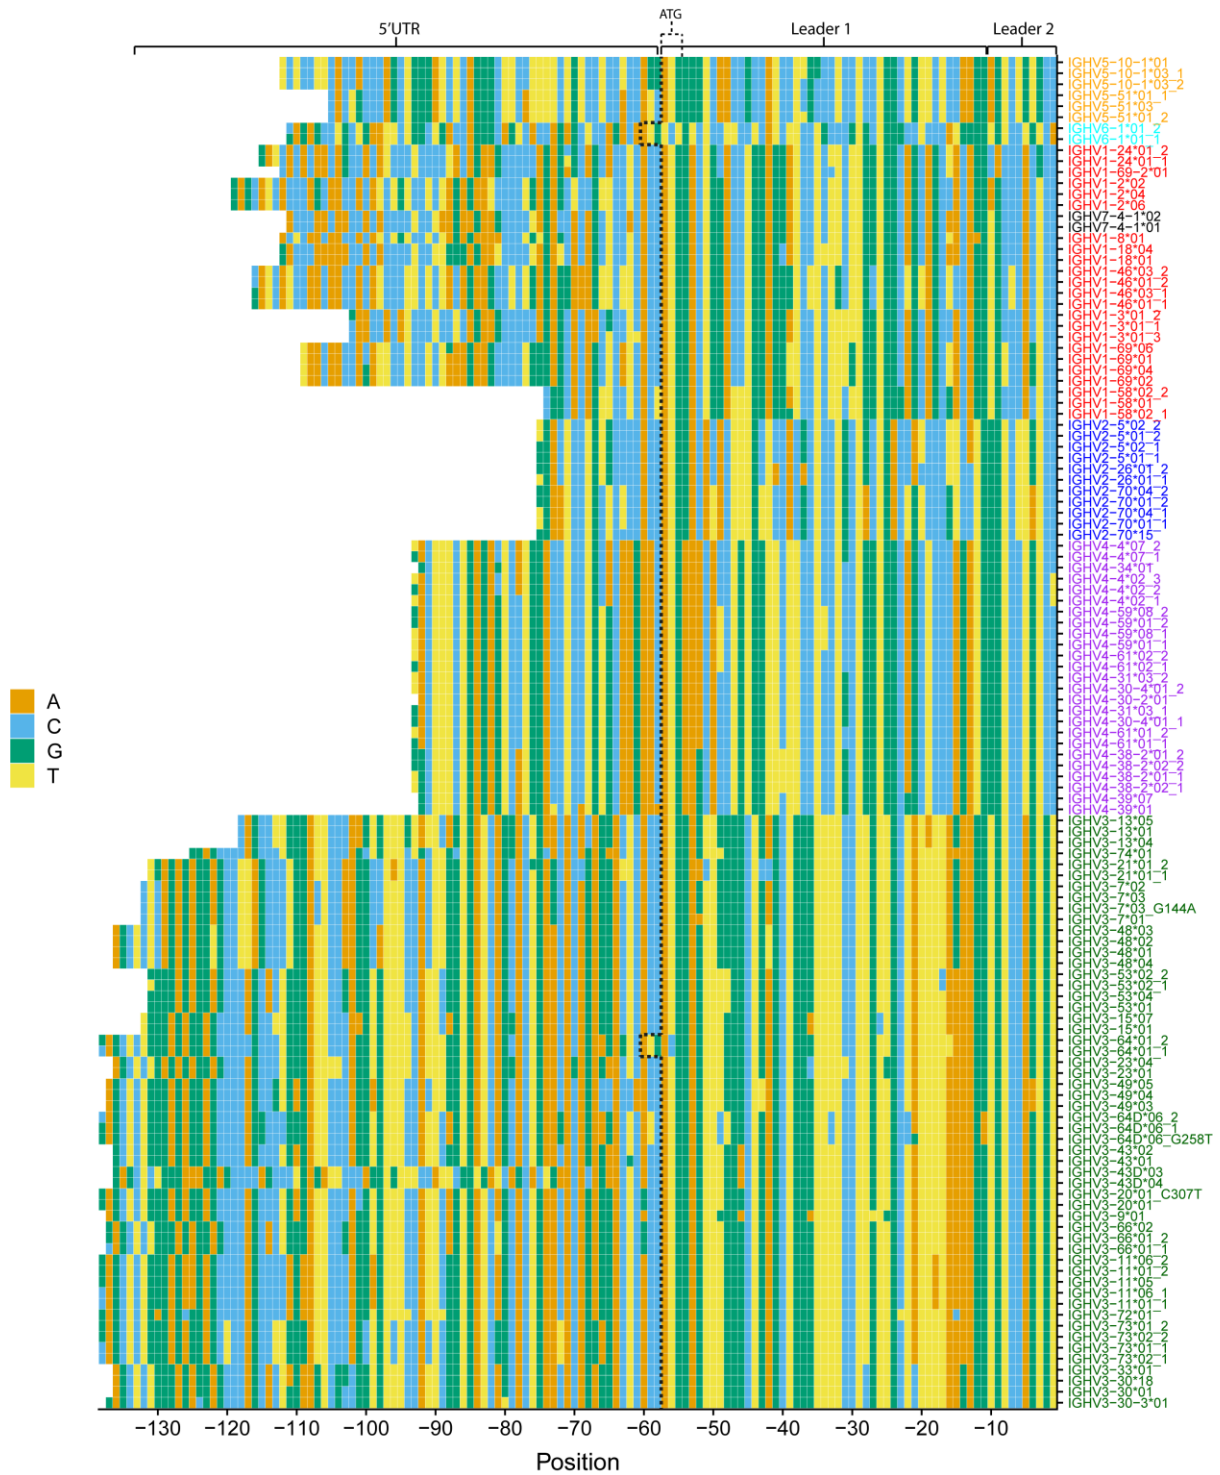

164

165 **Figure 3. Upstream germline reference dataset.** For each allele, consensus upstream sequences were built.  
166 Consensus sequences constructed from clusters with less than 10 sequences or with relative frequency < 0.1  
167 were excluded. Each row represents a consensus upstream sequence of a V allele with 5' to 3' orientation. The  
168 colors of the tiles represent the different nucleotides. The coordinates on the x-axis describe the position of  
169 each nucleotide relative to the start of the V-region (5' to 3') and are therefore labeled as negative numbers.  
170 Alleles with more than one consensus sequence are marked with the allele name followed by an underscore  
171 and the respective consensus sequence number. For example, the two different consensus sequences for  
172 allele *IGHV3-64\*01* are marked as *IGHV3-64\*01\_1* and *IGHV3-64\*01\_2*. The number of individuals who carry  
173 each variant are shown in Supplementary Fig.5.

174 **Length of 5'UTRs correlates with the distance between TATA-box and start codon**

175 As depicted in Fig.3, the length of the 5'UTR differs between *IGHV* gene families, but is relatively  
176 conserved within a gene family. To investigate whether the different length of 5'UTRs among the  
177 different families had any correlation with the distance from the promoter elements, we decided to  
178 inspect the reference gDNA sequence from the IMGT database. We collected the available germline  
179 reference sequences of the upstream flanking regions of V-gene promoters from the IMGT/GENE-DB  
180 and aligned them to look for conserved patterns.

181 Using the sequences from the IMGT reference database, we determined the distance between the  
182 ATG start codon and the reference or putative TATA-box. We found that this distance varied greatly  
183 between different gene families. By comparing this distance to the 5'UTR length from the AIRR-seq  
184 data, we observed that the distance between the ATG and the TATA-box correlated with the length of  
185 the 5'UTR (Supplementary Fig.7). Sequences with longer ATG to TATA-box distance had longer  
186 5'UTRs.

187 **Differences in the upstream sequences can aid allele annotation**

188 The novel allele *IGHV3-64\*05\_G265C* was initially not validated by amplification of the gene *IGHV3-*  
189 *64*, as Sanger sequencing revealed only *IGHV3-64\*02* in a selected individual carrying the suspected  
190 polymorphism, and with no sequence corresponding to allele *\*05* being present (Fig.4b). Originally,  
191 this allele was ambiguously annotated as deriving from either *IGHV3-64\*05* or *IGHV3-64D\*06*, as it  
192 differs by one nucleotide from each of these alleles (Fig.4a).

193 The upstream sequences of *IGHV3-64* and *IGHV3-64D* differ all across their length, including the  
194 5'UTR, leader 1, and leader 2 (Fig.3). The upstream regions of the novel allele *IGHV3-64\*05\_G265C*  
195 are identical to those of *IGHV3-64D*, which indicated that this is indeed an allele of *IGHV3-64D* and  
196 not *IGHV3-64*. Therefore, we decided to amplify the gene *IGHV3-64D* using primers specific to the  
197 duplicated gene only. This resulted in the novel allele being finally validated (Fig.4c). Upon obtaining  
198 the full germline sequence of the novel allele, we observed that its intron matched the one of *IGHV3-*  
199 *64D* and not *IGHV3-64* (Fig.4d).

200 The genes *IGHV3-43* and *IGHV3-43D* are another example of duplicated genes with differences in  
201 the upstream sequences. Unlike the previous example, *IGHV3-43* and *IGHV3-43D* seem to have  
202 identical leader 1 and leader 2 sequences but differ in the 5'UTR (Fig.3). However, not only genes,  
203 but also some alleles of the same gene can be distinguished by their upstream sequences. The novel  
204 allele *IGHV3-64D\*06\_G258T* differs from *IGHV3-64D\*06* in one position located in leader 1. Similarly,  
205 *IGHV4-39\*01* and *IGHV4-39\*07* have three differences within the 5'UTR; and the alleles *IGHV3-*  
206 *43\*01* and *\*02* differ in one position within the 5'UTR.

207



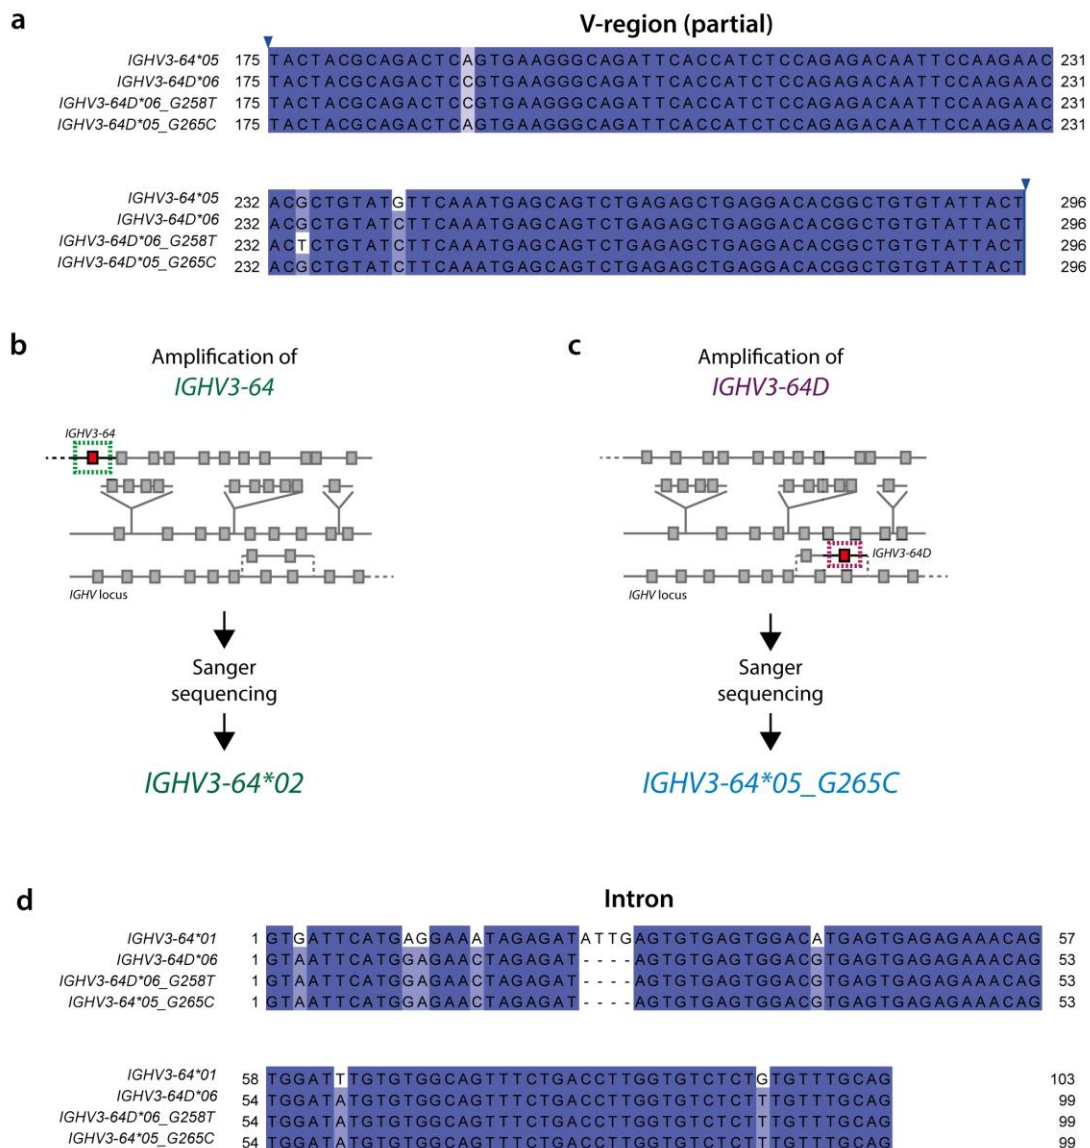

208

209 **Figure 4. Genomic validation of *IGHV3-64(D)* alleles.** (a) Alleles *IGHV3-64\*05* and *IGHV3-64D\*06* differ in only  
 210 two positions within the V-region. To validate novel *IGHV3-64* and *IGHV3-64D* alleles found in the AIRR-seq  
 211 data and ensure their correct annotation, we PCR amplified the genes *IGHV3-64* and *IGHV3-64D* from gDNA of  
 212 selected individuals using gene-specific primers. (b, c) The process of validation of *IGHV3-64\*05 G265C*  
 213 depicted with a schematic *IGHV* locus representation. The novel allele was originally assigned as being closest  
 214 to *IGHV3-64\*05*, however, this allele was not amplified by primers specific for *IGHV3-64*. The novel allele was  
 215 detected when *IGHV3-64D* was amplified. (d) Comparison of the intronic regions of *IGHV3-64\*01*, *IGHV3-*  
 216 *64D\*06* and the novel *IGHV3-64D* alleles. The reference sequence of *IGHV3-64\*05* in the IMGT database is  
 217 partial and lacking the intron, and therefore could not be compared. The intron of the novel allele originally  
 218 annotated as *IGHV3-64\*05 G265C* matches the one of *IGHV3-64D*. The numbers in the alignments (a,d) do not  
 219 follow the unique IMGT numbering.

220

221

## 222 DISCUSSION

223 Our analysis of the naïve B cell immunoglobulin repertoire data from 98 individuals revealed several  
224 novel polymorphisms both in the coding and in the upstream sequences of *IGHV* genes. To our  
225 knowledge, we are the first to provide a comprehensive overview of upstream (5'UTR, leader 1, and  
226 leader 2) *IGHV* sequence variants in an AIRR-seq dataset. We managed to validate a number of  
227 novel alleles by targeted amplification of genomic DNA of the same individuals. In addition, we report  
228 the presence of G at position 318 instead of A in the gDNA sequence of *IGHV3-7\*02*, which supports  
229 the findings of previous studies<sup>31,32</sup>.

230 We faced several issues with missing or incomplete genomic reference sequences, which  
231 complicated the design of efficient primers for verification of novel alleles. Some of our validation  
232 attempts were unsuccessful resulting only in the amplification of a “wild-type” allele without a  
233 polymorphism. We suspect this might be caused by allelic dropout<sup>33,34</sup>. As we show in our upstream  
234 sequence overview (Fig.4), alleles *IGHV4-39\*01* and *IGHV4-39\*07* differ at multiple positions within  
235 the 5'UTRs. Our primers were designed to bind flanking sequences of the gene, and their design was  
236 based on the current reference genome, which contains the allele \*01 of *IGHV4-39*. Potential  
237 differences in the primer binding regions could be the cause of a failure to amplify the novel alleles, in  
238 this case *IGHV4-39\*07\_C288A*.

239 Although AIRR-seq studies are very useful for characterizing variation in immunoglobulin genes, one  
240 of the main limitations are issues with gene and allele annotation<sup>35</sup>. The V-region is annotated based  
241 on the most similar allele in the reference database. However, since the V genes are highly similar,  
242 this annotation might not always be correct. Incorrect gene assignment could lead to potential  
243 downstream errors in analysis. In our study, the novel allele originally annotated as *IGHV3-*  
244 *64\*05\_G265C* was later found to be derived from the gene *IGHV3-64D*, located on a different part of  
245 the *IGHV* locus than *IGHV3-64*. As previously shown<sup>4,5,9</sup>, *IGHV3-64D* is likely a part of an alternative  
246 haplotype, since it was found to be deleted in many individuals, even in this cohort<sup>30</sup>. These two  
247 genes differ in their upstream sequences, and thanks to this distinction, we were able to correctly  
248 assign the novel allele to *IGHV3-64D* and validate it from gDNA.

249 Our results demonstrate that polymorphisms in the upstream regions can be utilized to improve  
250 annotation methods presently employed. Having said that, the genetic variation in the sequences  
251 upstream of the V-region is currently poorly characterized. Many reference sequences, which were  
252 deposited to the IMGT germline database are partial and contain only the V-region sequence. It is  
253 surprising that the genetic variation in the upstream regions is overlooked, considering the fact that  
254 the leader regions are frequently used as primer binding sites for immunoglobulin repertoire library  
255 preparation protocols<sup>32,36,37</sup>.

256 The reason for the existence of upstream polymorphisms is unclear, but conceivably such  
257 polymorphisms might have functional relevance by influencing stability of the mRNA or by affecting  
258 the binding of regulatory proteins<sup>38,39</sup>. Further studies are needed to explore polymorphisms in the

259 upstream sequences and to determine whether they have any functional effect. Association of these  
260 allelic variants with disease can be studied in sufficiently powered studies. In addition, more genomic  
261 studies could be performed to characterize their promoters and other regulatory elements, which  
262 might help explain the differences in expression levels across individuals.

263

## 264 **METHODS**

### 265 **AIRR Sequencing of naïve B-cells**

266 The data was obtained as a part of a previously published study<sup>30</sup>. In summary, naïve B cells from  
267 100 individuals were sorted from peripheral blood mononuclear cells (PBMCs). The RNA was isolated  
268 and quality checked before being sent to AbViro, Inc for library preparation and sequencing on  
269 Illumina MiSeq (2x300bp). About half of the cohort are celiac disease patients, and these subjects  
270 were included to increase the diversity of the cohort. Of note, this study was not designed and  
271 powered to perform comparative analysis of allelic frequencies between patients and controls.

### 272 **Amplification of target genomic regions**

273 Genomic DNA (gDNA) was isolated from previously sorted T cells and monocytes (CD19-  
274 CD3+/CD14+)<sup>30</sup> using the QiaAmp DNA mini kit (Qiagen), and the concentration was measured on  
275 Nanodrop.

276 Primers for validation were designed by PrimerBLAST using the reference genome as a template.  
277 The nucleotide sequences of primers with additional details can be found in the Supplementary  
278 material. For amplification of genes *IGHV3-7*, *IGHV3-20*, and *IGHV3-21*, primers from a recently-  
279 published study<sup>32</sup> were used. All oligos were synthesized and purified (RP-cartridge) by Eurogentec.

280 The target regions of the gDNA were amplified by touch-down PCR using Q5<sup>®</sup> Hot Start High-Fidelity  
281 DNA Polymerase (NEB). Approx. 100 - 200 ng gDNA from an individual with a suspected  
282 polymorphism was used as a template. The PCR started with two cycles with the annealing  
283 temperature of 70°C. The touch-down part of the PCR consisted of 10 cycles with the annealing  
284 temperature decreasing from 70°C to 60°C by 1°C every cycle. In the next 13 cycles, the annealing  
285 temperature remained constantly at 60°C, and the last step of the PCR was the final extension at  
286 72°C. The length of the PCR product varied depending on the amplified gene, ranging between 750bp  
287 and 986bp.

### 288 **Cloning**

289 The PCR products were cleaned using the Monarch<sup>®</sup> DNA Gel Extraction Kit (NEB), and 3' end A-  
290 overhangs were added by NEBNext<sup>®</sup> dA-Tailing Module (NEB). The A-tailed products were  
291 subsequently cloned into pGEM<sup>®</sup>-T Easy vector (Promega) using the manufacturer's protocol. For  
292 transformation, 4 µl of the ligation reaction were used to transform 90 µl XL10 CaCl<sub>2</sub>-competent cells.  
293 After transformation, 100 µl cells were plated on LB<sub>amp</sub> 50 µg/ml plates that have been previously  
294 coated with IPTG/X-Gal (40 µl 100 mM IPTG + 16µl 50 mg/ml X-Gal). The IPTG/X-Gal treatment

295 allows for selection of successfully transformed colonies based on color. After overnight incubation at  
296 37°C, white colonies were picked and the plasmids were isolated using the Monarch® Plasmid  
297 Miniprep Kit (NEB). To verify that the picked colonies contain an insert of the correct size, a PCR was  
298 performed using the same primers as for the amplification of gDNA, and the products were analyzed  
299 by gel electrophoresis (1% agarose, 100 V, 35 min). The size of the PCR product was between 750-  
300 986bp, depending on the gene amplified.

### 301 **Sanger sequencing**

302 Sanger sequencing of the plasmid DNA containing the correct-sized insert was performed by Eurofins.  
303 The resulting sequences were trimmed to remove the vector and primer sequences. V-gene  
304 annotation was done by IMGT/HighV-QUEST<sup>40</sup>. To check for polymorphisms in the introns, leader  
305 regions and 5'UTRs, the trimmed sequences were aligned by MUSCLE<sup>41,42</sup> to the reference alleles of  
306 the amplified gene, where available, and checked for polymorphisms. Alignments were visually  
307 inspected in Jalview<sup>43</sup> and/or UGENE<sup>44</sup>.

308 The sequences were named based on the amplified gene, followed by the closest reference allele  
309 and the V-region polymorphism, which was determined by IMGT V-Quest<sup>45</sup> or by manual annotation  
310 (in cases of ambiguous annotation).

311 The gDNA sequences of validated novel alleles were submitted to GenBank and subsequently to  
312 IMGT.

### 313 **AIRR-seq data pre-processing**

314 The AIRR-seq data was pre-processed as described originally<sup>30</sup> using pRESTO<sup>46</sup>. Two individuals  
315 were excluded from the analysis due to low sequencing depth (<2000).

### 316 **Novel allele discovery and genotype inference**

317 Genotype inference and novel allele discovery was also performed by TIgGER v 0.3.1 and IgDiscover  
318 v0.11. The pre-processed sequences were annotated by IgBLAST 1.14.0<sup>47</sup> with modified parameters,  
319 and the IMGT germline database (24) from January 2019 was used as a reference. The results of  
320 alignment and genotype inference by TIgGER were processed using a similar pipeline to the one  
321 used in <http://www.vdjbase.org> with slight modifications.

322 We experienced that the default settings resulted in incorrect annotation for some genes. This was  
323 particularly obvious for the allele *IGHV5-51\*03*, which was incorrectly annotated as *IGHV5-51\*01* with  
324 one mutation C45G, corresponding to the already known allele *\*03*. These two alleles differ only by  
325 one nucleotide, and it was the length of the reference allele that seemed to affect whether or not the  
326 sequence was correctly annotated by IgBLAST. The reference for *\*03* is 2 nt shorter than the  
327 reference sequence for *\*01*, while sequences in our data corresponding to *IGHV5-51\*03* were  
328 matching the length of allele *\*01*. Adjusting the IgBLAST parameters --reward to 0 and --penalty to -3  
329 resolved this annotation problem. These parameters were also induced manually in IgDiscover  
330 alignment step.

331 For novel allele detection we tested the parameters of the TlgGER function “findNovelAlleles”: 1)  
332 germline\_min to 50,100 and 200 (default). 2) j\_max to 0.15 (default), 0.3 and 0.5. 3) min\_seqs to 25  
333 and 50 (default). Different parameters resulted in different sets of novel alleles identified. To allow for  
334 discovery of novel alleles in lowly-expressed genes, we set the germline\_min parameter to 50. The  
335 rest of the parameters, including j\_max and min\_seqs, was left as default. The novel alleles were  
336 further submitted for genotype inference, using a Bayesian approach, for each individual. As for  
337 IgDiscover, the default parameters for novel allele and genotype calls were applied. Analysis of the  
338 IgDiscover and TlgGER output was performed in R Studio version 3.6.0.

### 339 **Filtering out false positive suspects**

340 Errors that occur during the PCR reaction and/or sequencing could result in a false novel allele call.  
341 To filter out the suspected false positive signals, we first determined the mismatch frequency for all  
342 novel allele candidates. Novel allele candidates with low mismatch frequency were considered as  
343 false positives. These included all alleles with mutation patterns A152G, T154G, and A85C. Although  
344 the mismatch frequencies of sequences with the A85C polymorphism seemed to follow a bimodal  
345 behavior (Supplementary Fig.1), the higher frequency mode that should correspond to heterozygous  
346 individuals is centered around 20%, and not 50% as would be expected. As a result, they were not  
347 considered as true novel alleles. On top of that, this polymorphism was only observed in four  
348 individuals that were sequenced in a pilot separately from the other samples, and A to C mutation is  
349 the most common substitution error in Illumina MiSeq<sup>48</sup>.

### 350 **Analysis of gene and allele usage**

351 Following the inference of genotype for each individual, we used IgBLAST 1.14.0<sup>47</sup> to re-align each  
352 individual's sequences with their own personalized germline *IGHV* database as inferred by TlgGER.  
353 To compare the relative gene usage in individuals with different allele combination, we selected  
354 sequences with V-region length >200 and up to 3 mutations. Since the duplicated genes *IGHV3-*  
355 *23\*01* and *IGHV3-23D\*01*; *IGHV1-69\*01* and *IGHV1-69D\*01*; *IGHV2-70\*04* and *IGHV2-70D\*04* have  
356 identical V-regions, they often result in ambiguous allele assignment. Annotation for sequences with  
357 ambiguous allele assignments for these genes were renamed *IGHV3-23\*01D*, *IGHV1-69\*01D* and  
358 *IGHV2-70\*04D*, respectively. Additionally, *IGHV3-30-5\*01* and *IGHV3-30\*18* are also identical; and  
359 we renamed them as *IGHV3-30X\*doub*; and *IGHV3-30X\*trip* if the sequence annotation also  
360 contained *IGHV3-30\*01* as another possible assignment. All remaining sequences with multiple allele  
361 annotations were filtered out. To plot the relative gene usage, we first calculated the relative usage  
362 fraction of each allele of a gene separately. Afterwards, we summed up the relative usage fractions of  
363 alleles of the same gene and plotted the relative usage of each gene across all individuals.

364

### 365 **Inference of upstream sequences (5'UTR, leader 1 and leader 2)**

366 We decided to look at the upstream regions that consist of (5'-3') 5'UTR, leader 1, and leader 2. For  
367 the analysis of the upstream regions, only sequences with up to 3 mutations in the V-region (after  
368 novel allele inference and genotyping) and single assignment V-call were selected. For each

369 individual, the V-region sequences were trimmed away and the remaining upstream sequences of the  
370 same V-gene were aligned by the last nucleotide of leader 2 sequence and flipped 3'-5'.

371 Since the length of the 5'UTR sequences of the same gene in AIRR-seq data can vary due to whole  
372 VDJ sequence length and sequencing length limitations, we needed to determine where to trim the  
373 longer sequences. To do this, we first filled the ends of sequences with Ns to match the length of the  
374 longest sequence for the respective gene. We then trimmed all sequences after the first position, at  
375 which 95% sequences contained N.

376 After that, for each allele and for each individual, we removed all artificially added Ns. Next, we  
377 estimated sequence lengths, and lengths with frequency above 0.1 were considered frequent.  
378 Sequences shorter than the shortest frequent sequence length were filtered out and sequences  
379 longer than the longest frequent sequence length were trimmed to match its length. By applying  
380 ClusterSets.py (--ident 0.999, --length 0.5) and BuildConsensus.py (--freq 0.6) from pRESTO, we  
381 constructed clusters that resulted in consensus sequences for each allele. For each cluster we  
382 calculated its frequency based on the number of sequences assigned to it. Clusters with frequency  
383 below 0.1 or with less than 10 sequences were removed.

384 For each allele, consensus sequences from all individuals, were trimmed to match the shortest  
385 consensus sequence, and identical sequences were re-collapsed by allele and individual. For some of  
386 the consensus sequences, one of the nucleotides was marked with ambiguous assignment (N) by  
387 BuildConsensus.py function. In such cases, the original cluster was split into two clusters based on  
388 the ambiguous assignment and consensus sequences were reconstructed manually. Finally, to create  
389 the consensus upstream sequences, for each allele the trimmed sequences were submitted to  
390 ClusterSets.py (--ident 1.0, --length 1.0) and BuildConsensus.py (--freq 0.6) functions and as a result,  
391 for each gene and allele a set of consensus V upstream sequences were gathered. In the last step,  
392 we compared and collapsed identical sequences from all individuals to create a database of upstream  
393 sequences in the cohort.

#### 394 **Analysis of the reference germline upstream sequences**

395 Reference germline sequences of the upstream sequences, including the 5'UTR, were obtained from  
396 the IMGT GENE-DB and by searching through the IMGT "Gene tables" in order to get an alternative  
397 longer sequence if available. The reference upstream sequences longer than 150 nt were aligned  
398 using the MUSCLE tool at EMBL-EBI <sup>42</sup>, and the alignment was visualized by Jalview <sup>43</sup> to look for  
399 conserved regions. The obtained consensus sequences of conserved regions were compared to  
400 IMGT resources for annotation. The TATA-boxes were determined based on either the reference  
401 annotation by IMGT, searching through previous studies, or by looking for a TA-rich region  
402 downstream of the octamer. Promoters studied by older studies include that of *IGHV6*<sup>49</sup> (with two  
403 TATA-boxes) and *IGHV1*<sup>50</sup>.

404 *IGHV2* analysis is based on the available upstream reference sequences of *IGHV2-5\*01, \*02* and  
405 *IGHV2-70D\*04, \*14*. *IGHV3* schematic promoter representation was based on the upstream reference

406 genomic sequences of *IGHV3-43\*01*, *IGHV3-48\*02*, *IGHV3-49\*03*, *IGHV3-64\*02*, *IGHV3-64D\*06* and  
407 the genomic sequences obtained by Sanger sequencing of *IGHV3-7\*02* and *IGHV3-64D\*06*. The  
408 *IGHV4* schematic representation of the promoter was based the reference genomic sequences of  
409 *IGHV4-4\*07* and *\*08*; *IGHV4-28\*01*, *\*02*, *\*07*; *IGHV4-30-2\*06*; *IGHV4-30-4\*07*; *IGHV4-31\*02*; *IGHV4-*  
410 *34\*01*, *\*02*, *\*11*; *IGHV4-38-2\*02*; *IGHV4-39\*01*; *IGHV4-59\*01*, *\*02*, *\*11*; and *IGHV4-61\*01*, *\*08*, *\*09*.

#### 411 **Data availability**

412 The pipeline for novel allele discovery and genotype processing using the software tools TIGGER and  
413 IgBLAST is available on the VDJbase website (<https://www.vdjbase.org>). Custom code for the  
414 analysis of upstream sequences is available at [https://bitbucket.org/yaarilab/cluster\\_5utr/src/master/](https://bitbucket.org/yaarilab/cluster_5utr/src/master/).

415 Sanger sequences of validated *IGHV* alleles have been deposited in the GenBank under accession  
416 numbers: MN337615 (*IGHV1-2\*02\_G207T*), MN337616 (*IGHV1-3\*01\_T35A*), MN337617 (*IGHV1-*  
417 *46\*01\_C213G*), MN337618 (*IGHV1-69\*01\_C243T*), MN337619 (*IGHV3-7\_G144A\_T300C*),  
418 MN337620 (*IGHV3-7\*02\_A318G*), MN337621 (*IGHV3-9\*01\_T307C*), MN337622 (*IGHV3-*  
419 *20\*01\_C307T*), MN337623 (*IGHV3-21\*01\_C255T*), MN337624 (*IGHV3-64D\*06\_G258T*), and  
420 MN337625 (*IGHV3-64D\*06\_C210A*).

421

#### 422 **ACKNOWLEDGEMENTS**

423 This work was supported by grants from the Research Council of Norway through its Centre of  
424 Excellence funding scheme [project number 179573/V40], the South-Eastern Norway Regional Health  
425 Authority [project 2016113] and Stiftelsen KG Jebsen [SKGMED-017] to L.M.S., and grants from ISF  
426 [grant number 832/16] to G.Y., M.G. and A.P.

427 This project has also received funding from the European Union's Horizon 2020 research and  
428 innovation program under grant agreement No 825821. The contents of this document are the sole  
429 responsibility of the iReceptor Plus Consortium and can under no circumstances be regarded as  
430 reflecting the position of the European Union.

431 Elements of Figure 1 were modified from Servier Medical Art, licensed under a Creative Common  
432 Attribution 3.0 Generic License (<http://smart.servier.com/>).

433 We would like to thank Knut E. A. Lundin for coordinating collection of blood samples of participating  
434 subjects and for being responsible for the ethical approval for the project. We also thank Victor Greiff  
435 for discussions and helpful advice; and Marie K. Johannesen and Bjørg Simonsen for technical  
436 assistance. We would also like to express our gratitude to all study participants.

437

438

439

440 **AUTHOR CONTRIBUTIONS**

441 L.M.S. and G.Y. conceived and supervised the project; I.M., I.L. and O.S. carried out the experimental  
442 work; M.G., I.M., A.P., and G.Y. analyzed the data; I.M., M.G., and L.M.S. wrote the paper. All authors  
443 edited the manuscript.

444

445 **COMPETING INTERESTS**

446 No conflict of interests declared.

447

448 **REFERENCES**

- 449 1. Murphy, K. & Weaver, C. *Janeway's immunobiology*, (Garland Science, 2016).  
450 2. McBride, O.W. *et al.* Localization of human variable and constant region immunoglobulin  
451 heavy chain genes on subtelomeric band q32 of chromosome 14. *Nucleic Acids Research* **10**,  
452 8155-8170 (1982).  
453 3. McBride, O. *et al.* Chromosomal location of human kappa and lambda immunoglobulin light  
454 chain constant region genes. *The Journal of Experimental Medicine* **155**, 1480-1490 (1982).  
455 4. Watson, C.T. & Breden, F. The immunoglobulin heavy chain locus: genetic variation, missing  
456 data, and implications for human disease. *Genes & Immunity* **13**, 363-373 (2012).  
457 5. Watson, Corey T. *et al.* Complete haplotype sequence of the human immunoglobulin heavy-  
458 chain variable, diversity, and joining genes and characterization of allelic and copy-number  
459 variation. *The American Journal of Human Genetics* **92**, 530-546 (2013).  
460 6. Matsuda, F. *et al.* The complete nucleotide sequence of the human immunoglobulin heavy  
461 chain variable region locus. *The Journal of Experimental Medicine* **188**, 2151 (1998).  
462 7. Watson, C.T. *et al.* Sequencing of the human IG light chain loci from a hydatidiform mole  
463 BAC library reveals locus-specific signatures of genetic diversity. *Genes & Immunity* **16**, 24-34  
464 (2015).  
465 8. Kidd, M.J. *et al.* The inference of phased haplotypes for the immunoglobulin H chain V region  
466 gene loci by analysis of VDJ gene rearrangements. *The Journal of Immunology* **188**, 1333  
467 (2012).  
468 9. Kirik, U., Greiff, L., Levander, F. & Ohlin, M. Parallel antibody germline gene and haplotype  
469 analyses support the validity of immunoglobulin germline gene inference and discovery.  
470 *Molecular Immunology* **87**, 12-22 (2017).  
471 10. Giudicelli, V., Chaume, D. & Lefranc, M.-P. IMGT/GENE-DB: a comprehensive database for  
472 human and mouse immunoglobulin and T cell receptor genes. *Nucleic Acids Research* **33**,  
473 D256-D261 (2005).  
474 11. The Immunoglobulin Polymorphism IgGRdb (IgPdb).  
475 12. Lees, W. *et al.* OGRDB: a reference database of inferred immune receptor genes. *Nucleic*  
476 *Acids Research* **48**, D964-D970 (2019).  
477 13. Rodríguez-Vicente, A.E. *et al.* Next-generation sequencing in chronic lymphocytic leukemia:  
478 recent findings and new horizons. *Oncotarget* **8**, 71234-71248 (2017).  
479 14. Ghiotto, F. *et al.* Mutation pattern of paired immunoglobulin heavy and light variable  
480 domains in chronic lymphocytic leukemia B cells. *Molecular medicine (Cambridge, Mass.)* **17**,  
481 1188-1195 (2011).  
482 15. Wang, C. *et al.* B-cell repertoire responses to varicella-zoster vaccination in human identical  
483 twins. *Proceedings of the National Academy of Sciences* **112**, 500 (2015).



- 484 16. Galson, J.D. *et al.* B-cell repertoire dynamics after sequential hepatitis B vaccination and  
485 evidence for cross-reactive B-cell activation. *Genome Medicine* **8**, 68 (2016).
- 486 17. Roy, B. *et al.* High-throughput single-cell analysis of B cell receptor usage among  
487 autoantigen-specific plasma cells in celiac disease. *The Journal of Immunology* **199**, 782  
488 (2017).
- 489 18. Di Niro, R. *et al.* High abundance of plasma cells secreting transglutaminase 2-specific IgA  
490 autoantibodies with limited somatic hypermutation in celiac disease intestinal lesions.  
491 *Nature Medicine* **18**, 441 (2012).
- 492 19. Bashford-Rogers, R.J.M., Smith, K.G.C. & Thomas, D.C. Antibody repertoire analysis in  
493 polygenic autoimmune diseases. *Immunology* **155**, 3-17 (2018).
- 494 20. Brown, A.J. *et al.* Augmenting adaptive immunity: progress and challenges in the  
495 quantitative engineering and analysis of adaptive immune receptor repertoires. *Molecular*  
496 *Systems Design & Engineering* **4**, 701-736 (2019).
- 497 21. Yaari, G. & Kleinstein, S.H. Practical guidelines for B-cell receptor repertoire sequencing  
498 analysis. *Genome Medicine* **7**, 121 (2015).
- 499 22. Gadala-Maria, D. *et al.* Identification of subject-specific immunoglobulin alleles from  
500 expressed repertoire sequencing data. *Frontiers in Immunology* **10**(2019).
- 501 23. Gadala-Maria, D., Yaari, G., Uduman, M. & Kleinstein, S.H. Automated analysis of high-  
502 throughput B-cell sequencing data reveals a high frequency of novel immunoglobulin V gene  
503 segment alleles. *Proceedings of the National Academy of Sciences* **112**, E862 (2015).
- 504 24. Corcoran, M.M. *et al.* Production of individualized V gene databases reveals high levels of  
505 immunoglobulin genetic diversity. *Nature Communications* **7**, 13642 (2016).
- 506 25. Ralph, D.K. & Matsen, F.A.I.V. Per-sample immunoglobulin germline inference from B cell  
507 receptor deep sequencing data. *PLOS Computational Biology* **15**, e1007133 (2019).
- 508 26. Peres, A., Gidoni, M., Polak, P. & Yaari, G. RABHIT: R antibody haplotype inference tool.  
509 *Bioinformatics* **35**, 4840-4842 (2019).
- 510 27. Parks, T. *et al.* Association between a common immunoglobulin heavy chain allele and  
511 rheumatic heart disease risk in Oceania. *Nature Communications* **8**, 14946 (2017).
- 512 28. Avnir, Y. *et al.* IGHV1-69 polymorphism modulates anti-influenza antibody repertoires,  
513 correlates with IGHV utilization shifts and varies by ethnicity. *Scientific Reports* **6**, 20842  
514 (2016).
- 515 29. Watson, C.T., Glanville, J. & Marasco, W.A. The Individual and Population Genetics of  
516 Antibody Immunity. *Trends in Immunology* **38**, 459-470 (2017).
- 517 30. Gidoni, M. *et al.* Mosaic deletion patterns of the human antibody heavy chain gene locus  
518 shown by Bayesian haplotyping. *Nature Communications* **10**, 628 (2019).
- 519 31. Thörnqvist, L. & Ohlin, M. Critical steps for computational inference of the 3' -end of novel  
520 alleles of immunoglobulin heavy chain variable genes - illustrated by an allele of IGHV3-7.  
521 *Molecular Immunology* **103**, 1-6 (2018).
- 522 32. Vázquez Bernat, N. *et al.* High-quality library preparation for NGS-based immunoglobulin  
523 germline gene inference and repertoire expression analysis. *Frontiers in Immunology*  
524 **10**(2019).
- 525 33. Blais, J. *et al.* Risk of misdiagnosis due to allele dropout and false-positive PCR artifacts in  
526 molecular diagnostics: analysis of 30,769 genotypes. *The Journal of Molecular Diagnostics* **17**,  
527 505-514 (2015).
- 528 34. Soulsbury, C.D., Iossa, G., Edwards, K.J., Baker, P.J. & Harris, S. Allelic dropout from a high-  
529 quality DNA source. *Conservation Genetics* **8**, 733-738 (2007).
- 530 35. Smakaj, E. *et al.* Benchmarking immunoinformatic tools for the analysis of antibody  
531 repertoire sequences. *Bioinformatics* (2019).
- 532 36. René, C. *et al.* Comprehensive characterization of immunoglobulin gene rearrangements in  
533 patients with chronic lymphocytic leukaemia. *Journal of cellular and molecular medicine* **18**,  
534 979-990 (2014).

- 535 37. Vergani, S. *et al.* Novel method for high-throughput full-length IGHV-D-J sequencing of the  
536 immune repertoire from bulk B-cells with single-cell resolution. *Frontiers in Immunology*  
537 **8**(2017).
- 538 38. Steri, M., Idda, M.L., Whalen, M.B. & Orrù, V. Genetic variants in mRNA untranslated regions.  
539 *WIREs RNA* **9**, e1474 (2018).
- 540 39. Burke, T.W. & Kadonaga, J.T. The downstream core promoter element, DPE, is conserved  
541 from *Drosophila* to humans and is recognized by TAFII60 of *Drosophila*. *Genes &*  
542 *Development* **11**, 3020-3031 (1997).
- 543 40. Alamyar, E., Duroux, P., Lefranc, M.-P. & Giudicelli, V. IMGT® Tools for the nucleotide  
544 analysis of immunoglobulin (IG) and T cell receptor (TR) V-(D)-J repertoires, polymorphisms,  
545 and IG mutations: IMGT/V-QUEST and IMGT/HighV-QUEST for NGS. in *Immunogenetics:*  
546 *Methods and Applications in Clinical Practice* (eds. Christiansen, F.T. & Tait, B.D.) 569-604  
547 (Humana Press, Totowa, NJ, 2012).
- 548 41. Edgar, R.C. MUSCLE: multiple sequence alignment with high accuracy and high throughput.  
549 *Nucleic Acids Research* **32**, 1792-1797 (2004).
- 550 42. Madeira, F. *et al.* The EMBL-EBI search and sequence analysis tools APIs in 2019. *Nucleic*  
551 *acids research* **47**, W636-W641 (2019).
- 552 43. Waterhouse, A.M., Procter, J.B., Martin, D.M.A., Clamp, M. & Barton, G.J. Jalview Version  
553 2—a multiple sequence alignment editor and analysis workbench. *Bioinformatics* **25**, 1189-  
554 1191 (2009).
- 555 44. Okonechnikov, K., Golosova, O., Fursov, M. & the, U.t. Unipro UGENE: a unified  
556 bioinformatics toolkit. *Bioinformatics* **28**, 1166-1167 (2012).
- 557 45. Giudicelli, V., Chaume, D. & Lefranc, M.-P. IMGT/V-QUEST, an integrated software program  
558 for immunoglobulin and T cell receptor V–J and V–D–J rearrangement analysis. *Nucleic Acids*  
559 *Research* **32**, W435-W440 (2004).
- 560 46. Vander Heiden, J.A. *et al.* pRESTO: a toolkit for processing high-throughput sequencing raw  
561 reads of lymphocyte receptor repertoires. *Bioinformatics* **30**, 1930-1932 (2014).
- 562 47. Ye, J., Ma, N., Madden, T.L. & Ostell, J.M. IgBLAST: an immunoglobulin variable domain  
563 sequence analysis tool. *Nucleic Acids Research* **41**, W34-W40 (2013).
- 564 48. Schirmer, M. *et al.* Insight into biases and sequencing errors for amplicon sequencing with  
565 the Illumina MiSeq platform. *Nucleic Acids Research* **43**, e37-e37 (2015).
- 566 49. Sun, Z. & Kitchingman, G.R. Bidirectional transcription from the human immunoglobulin VH6  
567 gene promoter. *Nucleic Acids Research* **22**, 861-868 (1994).
- 568 50. Eaton, S. & Calame, K. Multiple DNA sequence elements are necessary for the function of an  
569 immunoglobulin heavy chain promoter. *Proceedings of the National Academy of Sciences* **84**,  
570 7634 (1987).

571

# **Polymorphisms in immunoglobulin heavy chain variable genes and their upstream regions**

Ivana Mikocziova<sup>1†\*</sup>, Moriah Gidoni<sup>2‡</sup>, Ida Lindeman<sup>1</sup>, Ayelet Peres<sup>2</sup>, Omri Snir<sup>1</sup>, Gur Yaari<sup>2‡</sup>, Ludvig M. Sollid<sup>1†</sup>

<sup>1</sup> K.G.Jebsen Centre for Celiac Disease Research and Department of Immunology, University of Oslo and Oslo University Hospital, 0372 Oslo, Norway

<sup>2</sup> Faculty of Engineering, Bar Ilan University, Ramat Gan 5290002, Israel

† Joint First Authors

‡ Joint Last Authors

\* To whom correspondence should be addressed. Email: [ivana.mikocziova@medisin.uio.no](mailto:ivana.mikocziova@medisin.uio.no)

## **Supplementary Material**

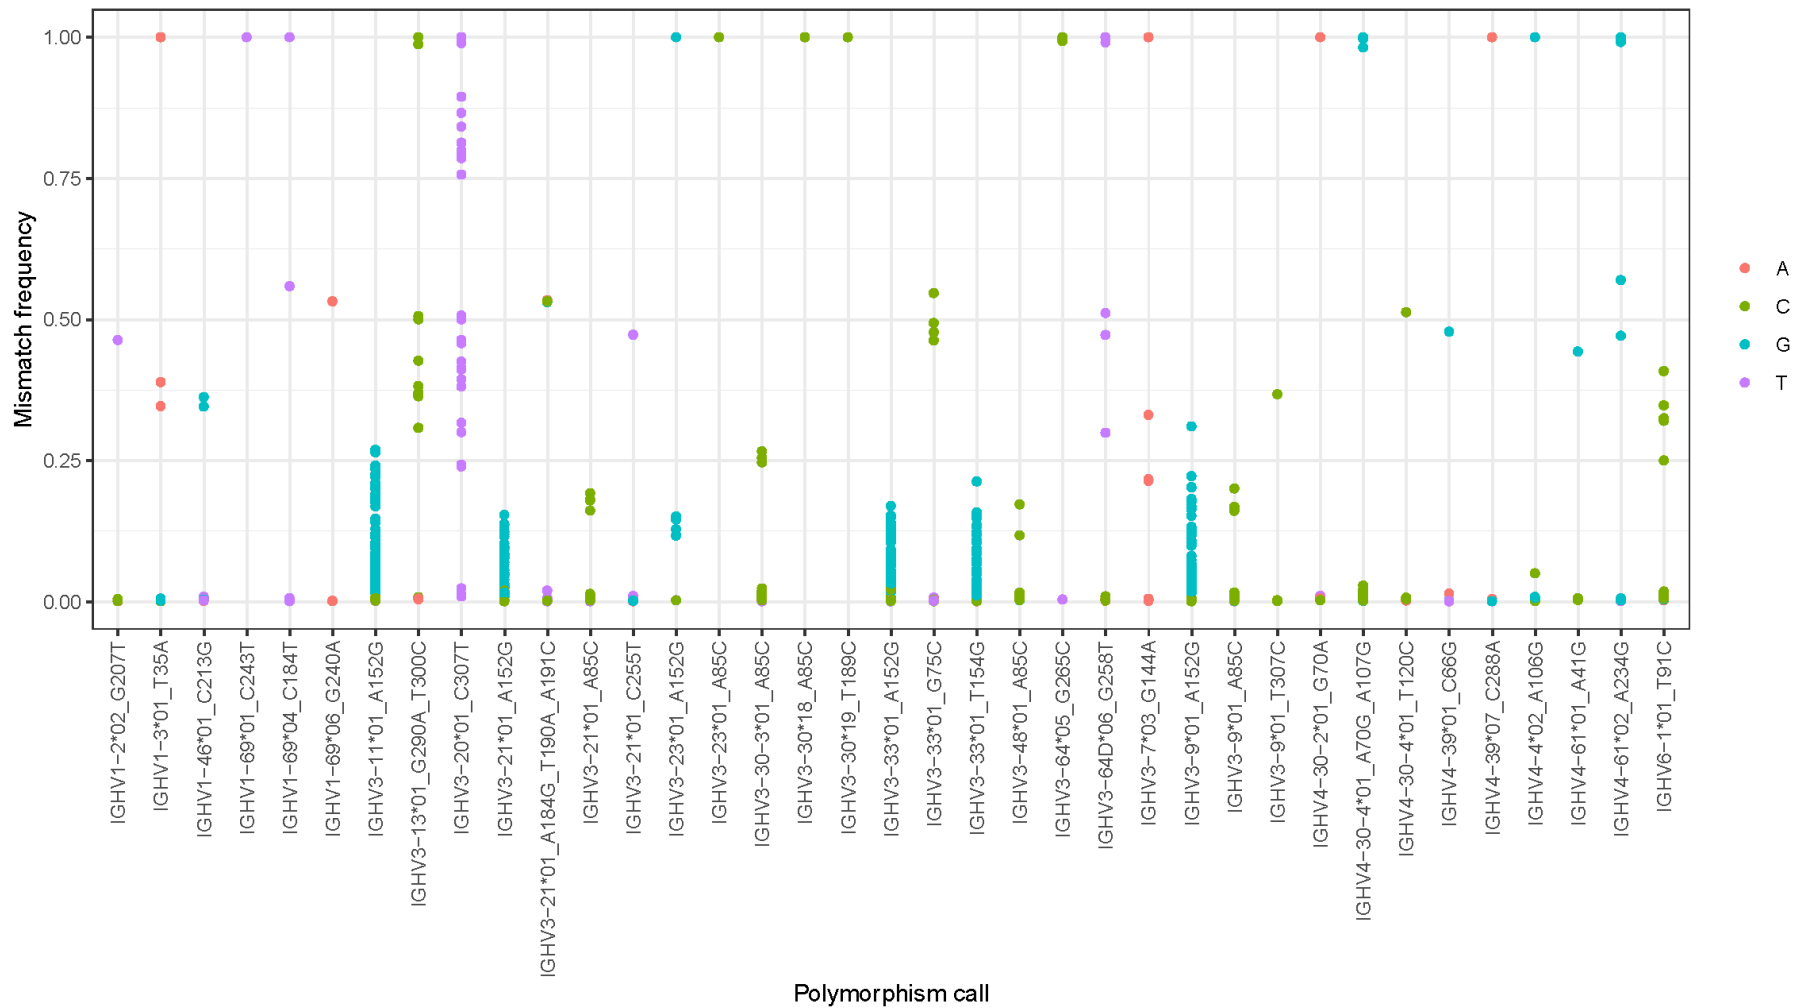

**Supplementary Figure 1. Germline mismatch frequency.** For each individual, relative frequencies of polymorphisms (y-axis) were calculated for positions in sequences aligned to an allele, for which a novel allele was inferred in the dataset (x-axis). Each dot represents a mismatch frequency for an individual for a certain allele and nucleotide. The color of the dot represents the nucleotide that does not match the germline.

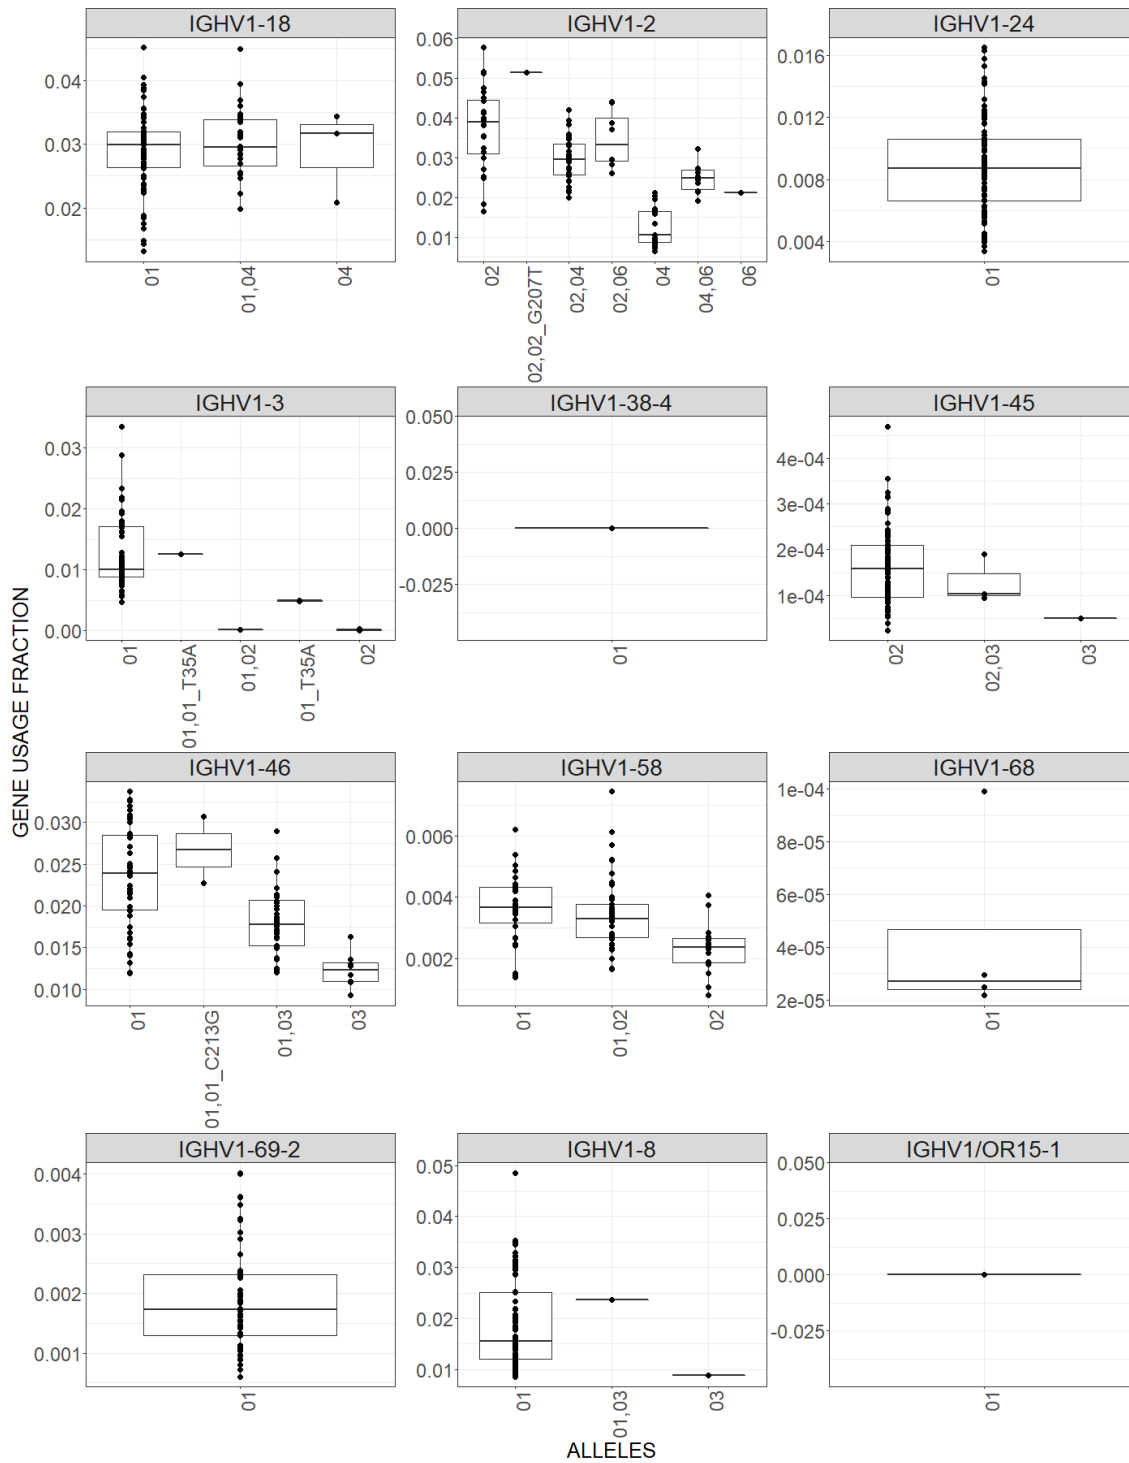

**Supplementary Figure 2. Usage of genes across individuals in the cohort.** For each allele of a gene, we calculated its relative usage fraction in each individual. The usage fractions of alleles of the same gene in the same individual were then summed, revealing the gene’s usage fraction. The x-axis shows the inferred allele, or multiple alleles, that were found in an individual’s inferred genotype. Each dot represents one individual. The y-axis shows the relative usage fraction of a gene within the expressed repertoire. The bar represents the median value. A bias can be observed in some genes, where the median gene usage is higher in individuals homozygous for a specific allele than those homozygous for another allele. This figure continues on the next five pages.

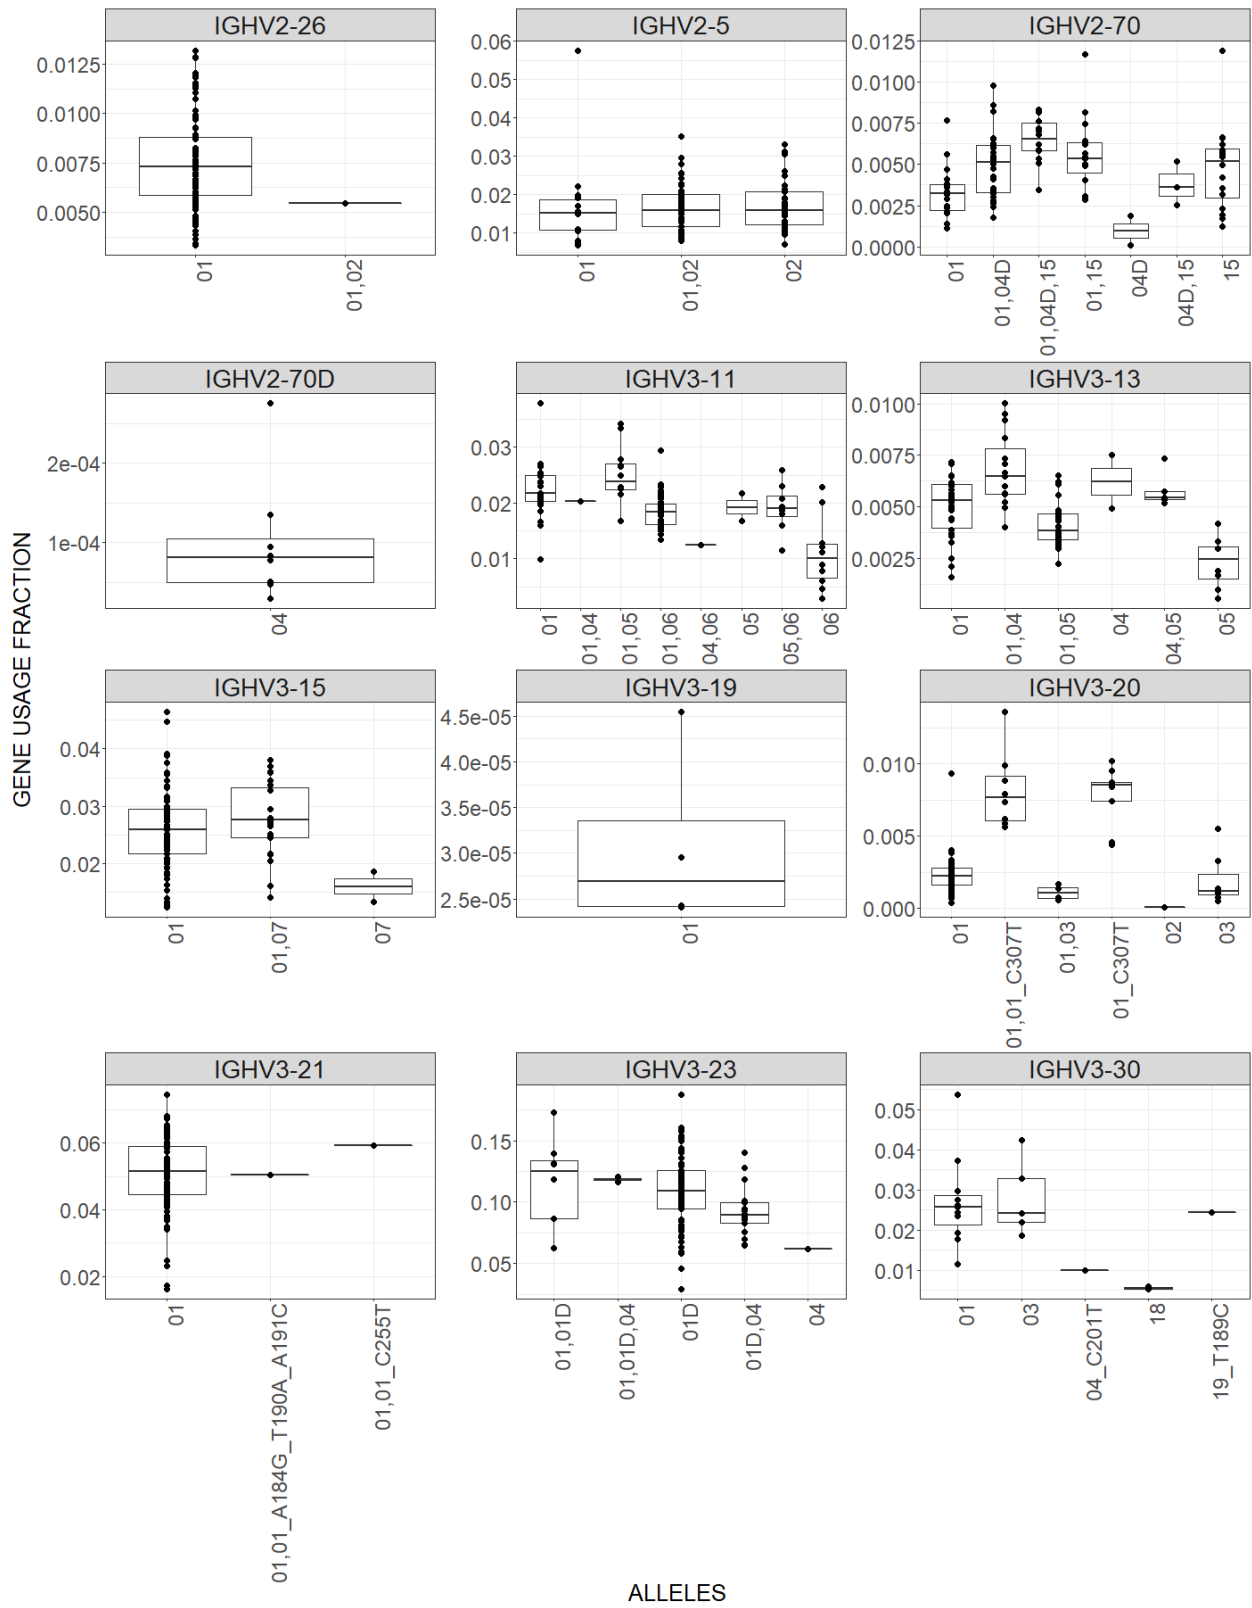

Supplementary Figure 2. continued

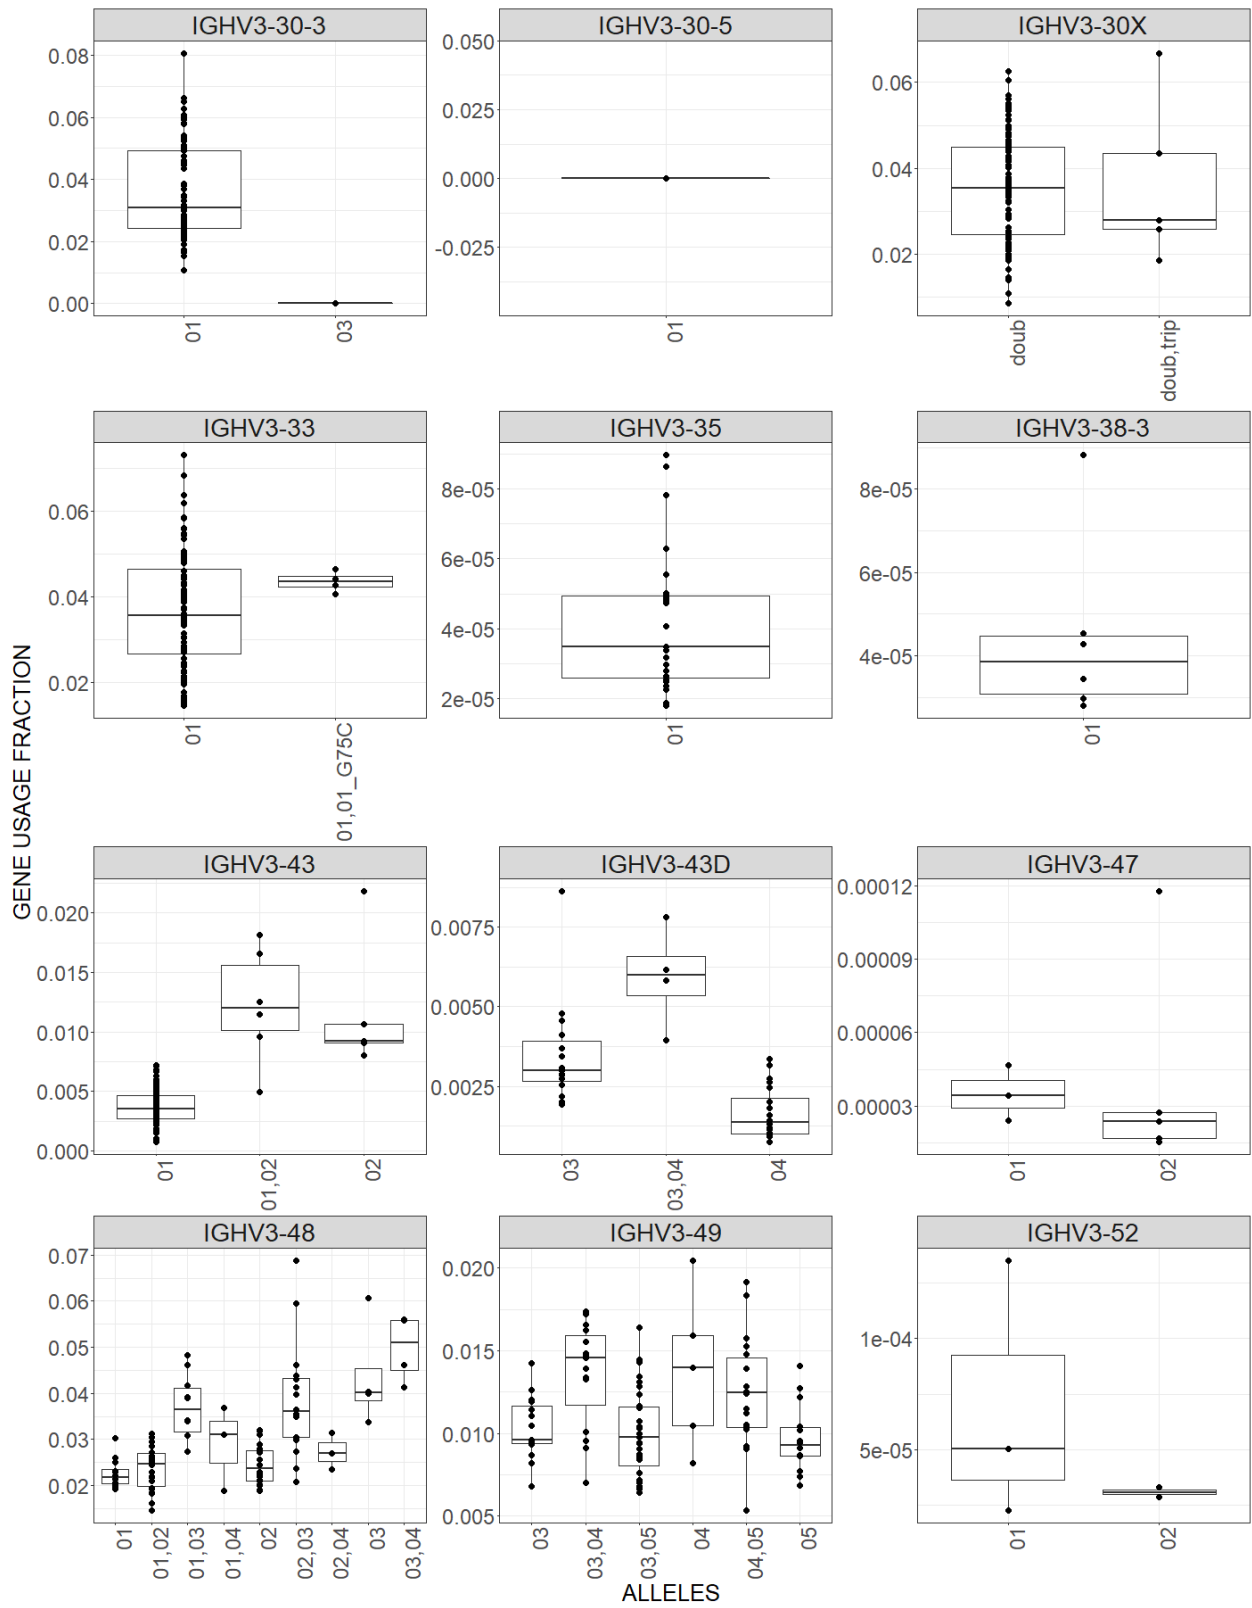

Supplementary Figure 2. continued

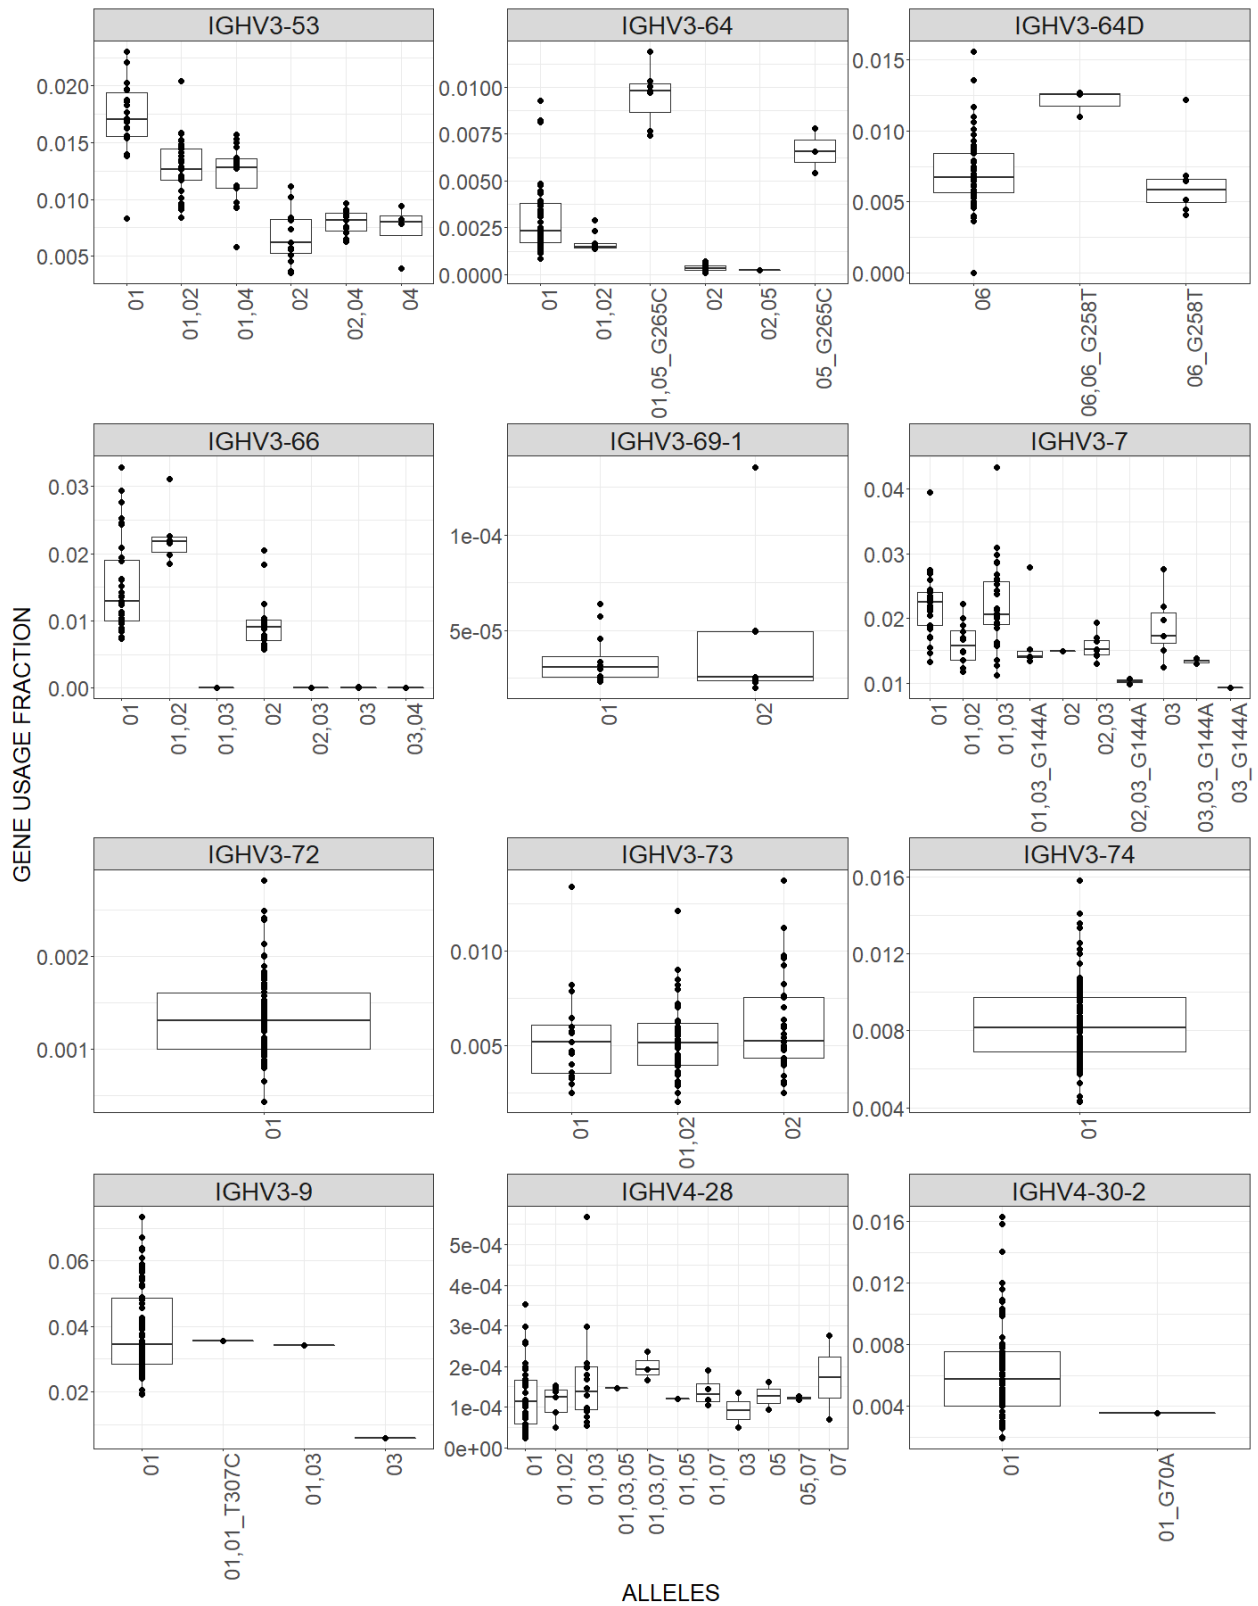

Supplementary Figure 2. continued



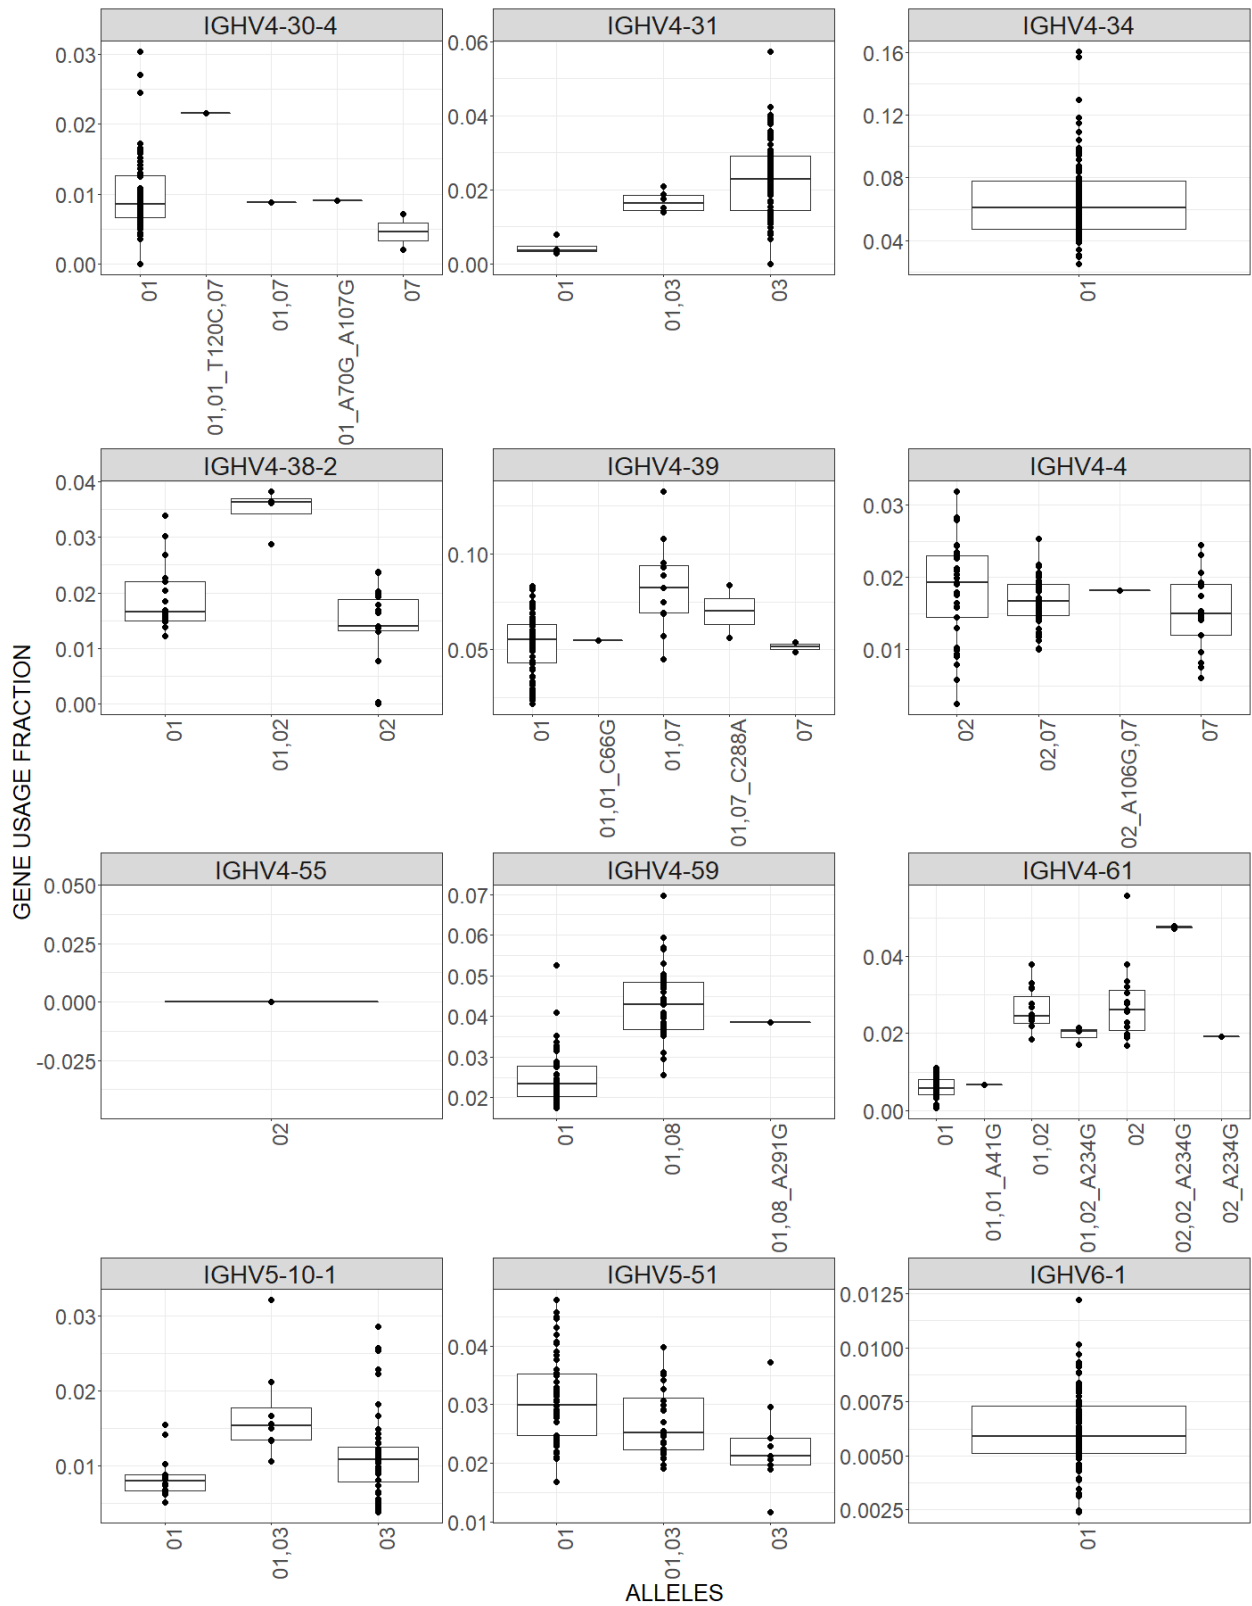

Supplementary Figure 2. continued

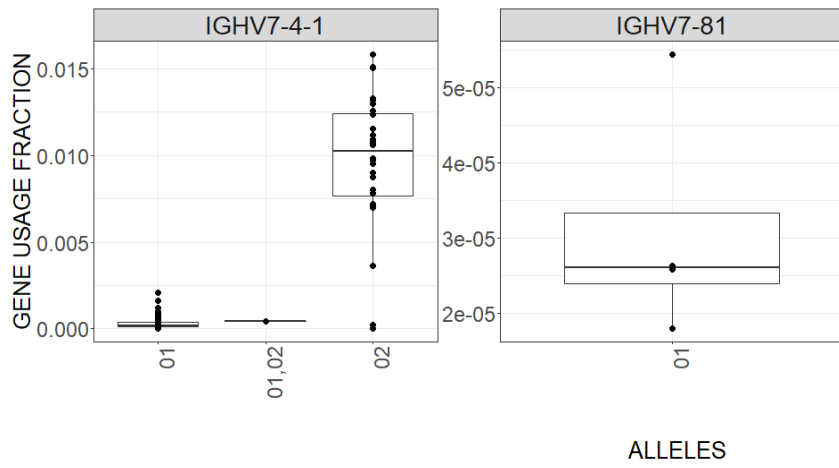

Supplementary Figure 2. Continued

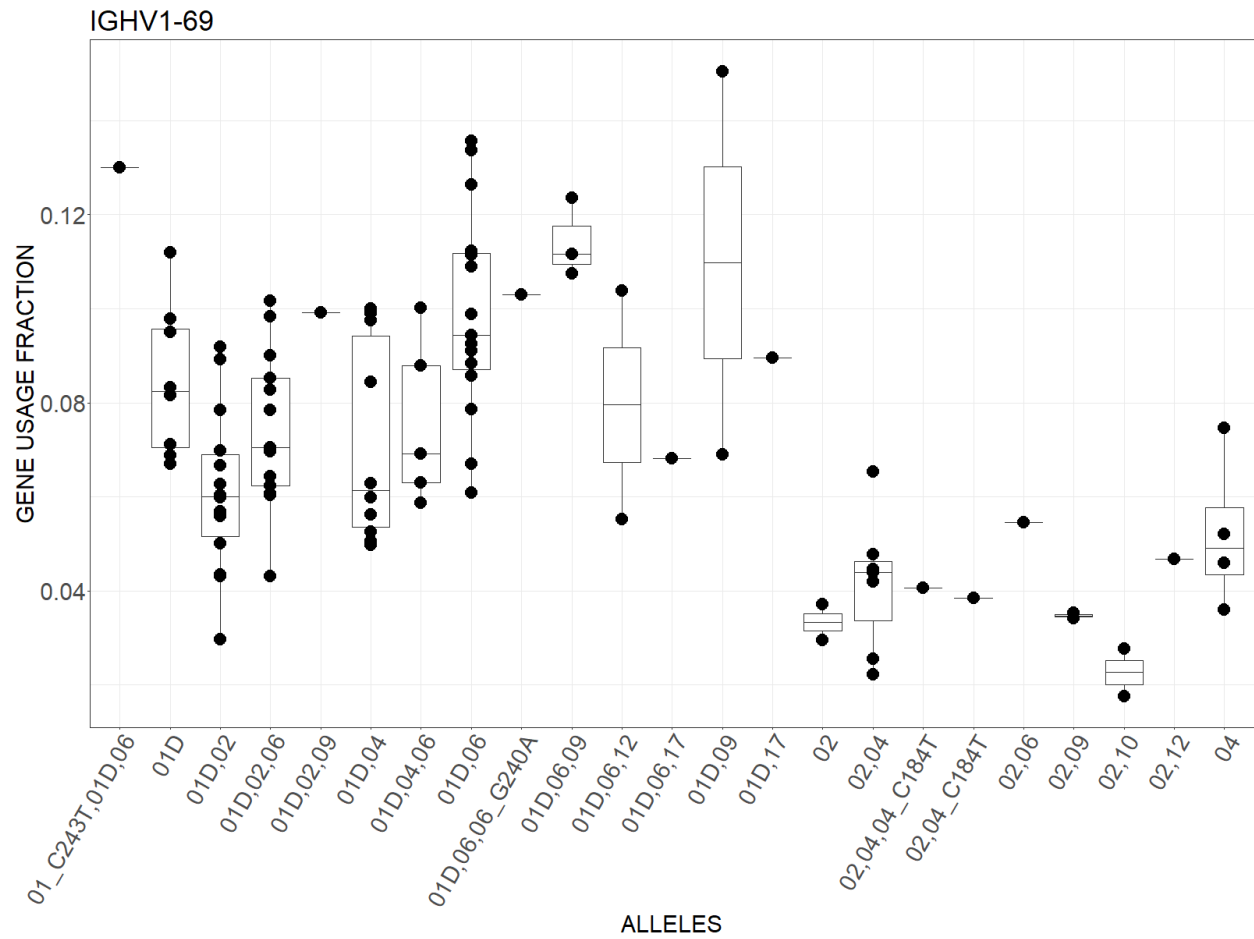

**Supplementary Figure 3. Usage of *IGHV1-69* across individuals in the cohort.** Relative usage fraction was calculated for each allele separately and in each individual, and the relative fractions of all expressed alleles were summed up. Different combinations of expressed alleles are shown on the x-axis, and the summed gene usage fraction is shown on the y-axis. Each dot represents one individual. The bar in the boxplot represents the median value.

### IGHV1-2\*02\_G207T

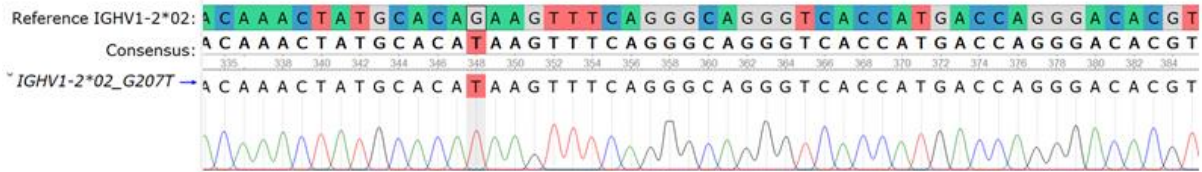

### IGHV1-3\*01\_T35A

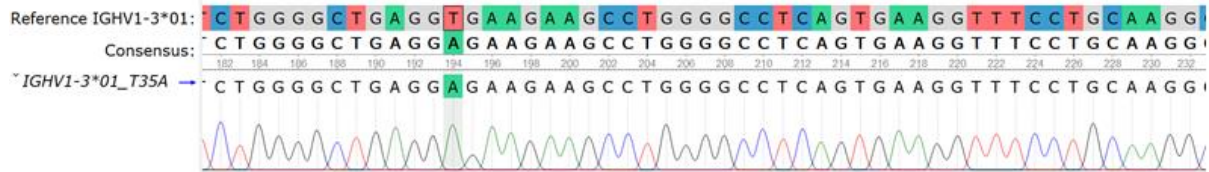

### IGHV1-46\*01\_C213G

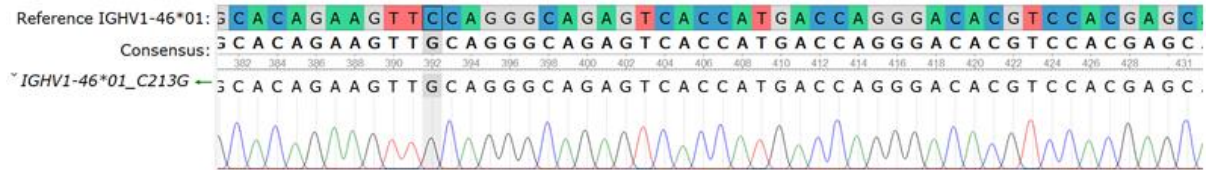

### IGHV1-69\*01\_C243T

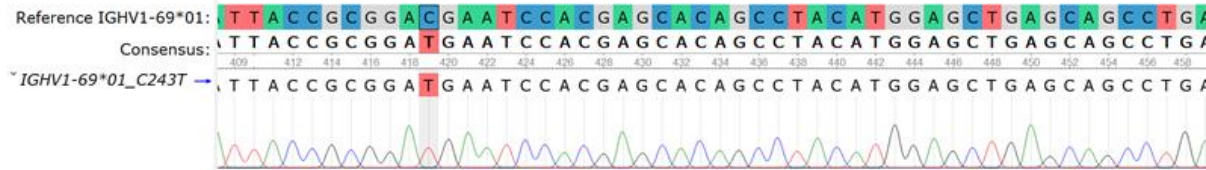

### IGHV3-7\*03\_G144A

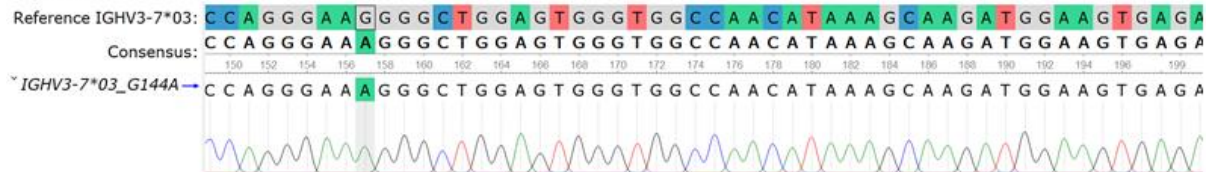

### IGHV3-7\*02\_A318G

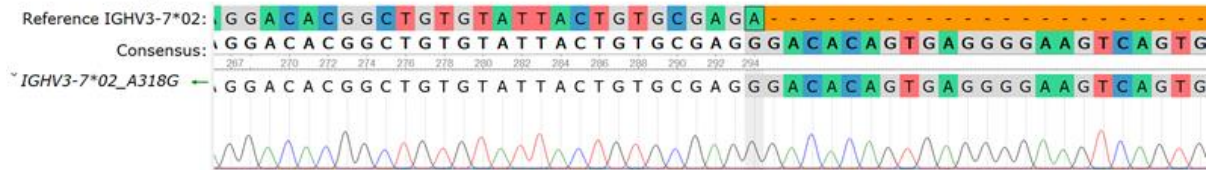

**Supplementary Figure 4.** Sanger sequencing results. Ten novel alleles were validated by targeted amplification and subsequent Sanger sequencing. The trace files were aligned to reference sequences from IMGT GENE-DB<sup>1</sup> and visualised by UGENE<sup>2</sup>. This figure continues on the next page.

**IGHV3-9\*01\_T307C**

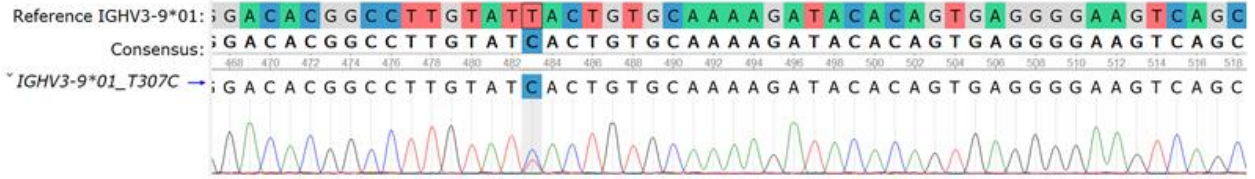

**IGHV3-20\*01\_C307T**

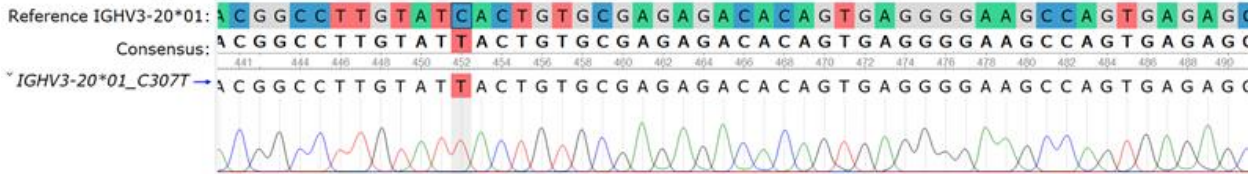

**IGHV3-21\*01\_C255T**

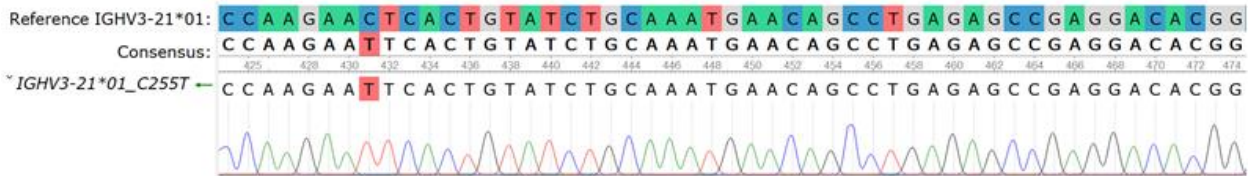

**IGHV3-64D\*06\_G258T**

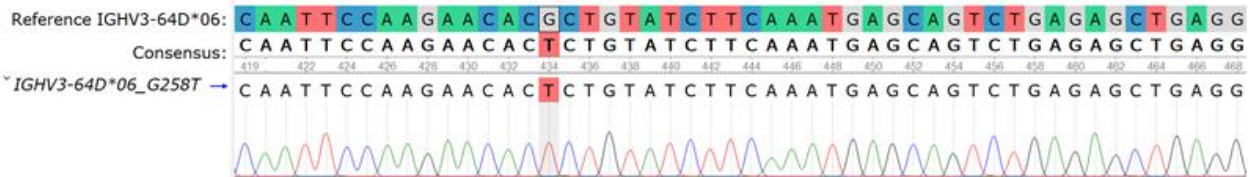

**IGHV3-64\*05\_G265C (originating from IGHV3-64D)**

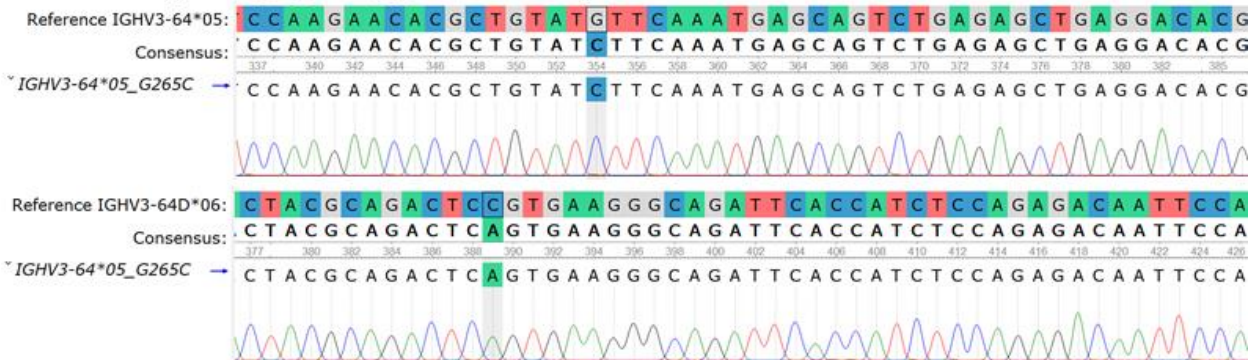

Supplementary Figure 4. continued

**Supplementary Table 1. Primers used for genomic validation.**

| <b>Primer name</b>                                            | <b>Nt sequence (5'-3')</b>   |
|---------------------------------------------------------------|------------------------------|
| IGHV1-2_fwd                                                   | CGGGAACCTGTTTTAGCAGAC        |
| IGHV1-2_rev                                                   | TTTCATTTCTCAGCCCCAGCA        |
| IGHV1-3_fwd                                                   | TCCAGTGGGAGAAGCTCTGT         |
| IGHV1-3_rev                                                   | GTCATTTCTCCATGCCAGC          |
| IGHV1-46_fwd                                                  | CTGTGTGGCAGATGGGACAT         |
| IGHV1-46_rev                                                  | TACTGAGTGTGGCCTTTCCC         |
| IGHV1-69_fwd                                                  | TGGGAGCACAGCTCATCA           |
| IGHV1-69_rev                                                  | CACTCTCAGGATGTGGGTTT         |
| IGHV3-9_fwd                                                   | AGGACTCACCATGGAGTTGG         |
| IGHV3-9_rev                                                   | TTTTTGCTGGGCTCTCGCT          |
| IGHV3-11_fwd                                                  | CAGCGTCCCACTAGAGCTTG         |
| IGHV3-11_rev                                                  | CTGCAGGGAGGTTTGTGTCT         |
| IGHV3-23_fwd                                                  | ATGCAAATAGAGCCCTCCGTCT       |
| IGHV3-23_rev                                                  | TTCTGTCCAGGACTGATTGCG        |
| IGHV3-64_fwd                                                  | TTTGGGCTGAGCTGGGTTTT         |
| IGHV3-64_rev                                                  | CAGGGAGGTTTCTGCATGGT         |
| IGHV3-64D_fwd                                                 | AAGGACTCTCATCTGCCC           |
| IGHV3-64D_rev                                                 | CTCCTTGTCACCTGCCTC           |
| IGHV5-51_fwd                                                  | GAGAGGGACAATAGCAGGGTGTA      |
| IGHV5-51_rev                                                  | CATATTGGAGAGGTGCCTGTTAGG     |
| IGHV6-1_fwd                                                   | AGTCACCAGAGCTCCAGACA         |
| IGHV6-1_rev                                                   | GCTCACACTGACTTCCCCTC         |
| <b>Primers from Vázquez Bernat <i>et al.</i><sup>3</sup>:</b> |                              |
| IGHV3-7R                                                      | CCTGGGGAAATTTGACGACGAGGCA    |
| IGHV3-7F                                                      | GGGTACAGCCTATTCTCCAGCA       |
| IGHV3-20R                                                     | GCACCTGGTCCCTGAGTTTACTGTGTTT |
| IGHV3-20F                                                     | CACGGGCCAGACAGTGAGACTGG      |
| IGHV3-21R                                                     | CGCCGCAGGCCATGACAGGAAGC      |
| IGHV3-21F                                                     | CAGCGTCCCACTAGAGCTTGT        |

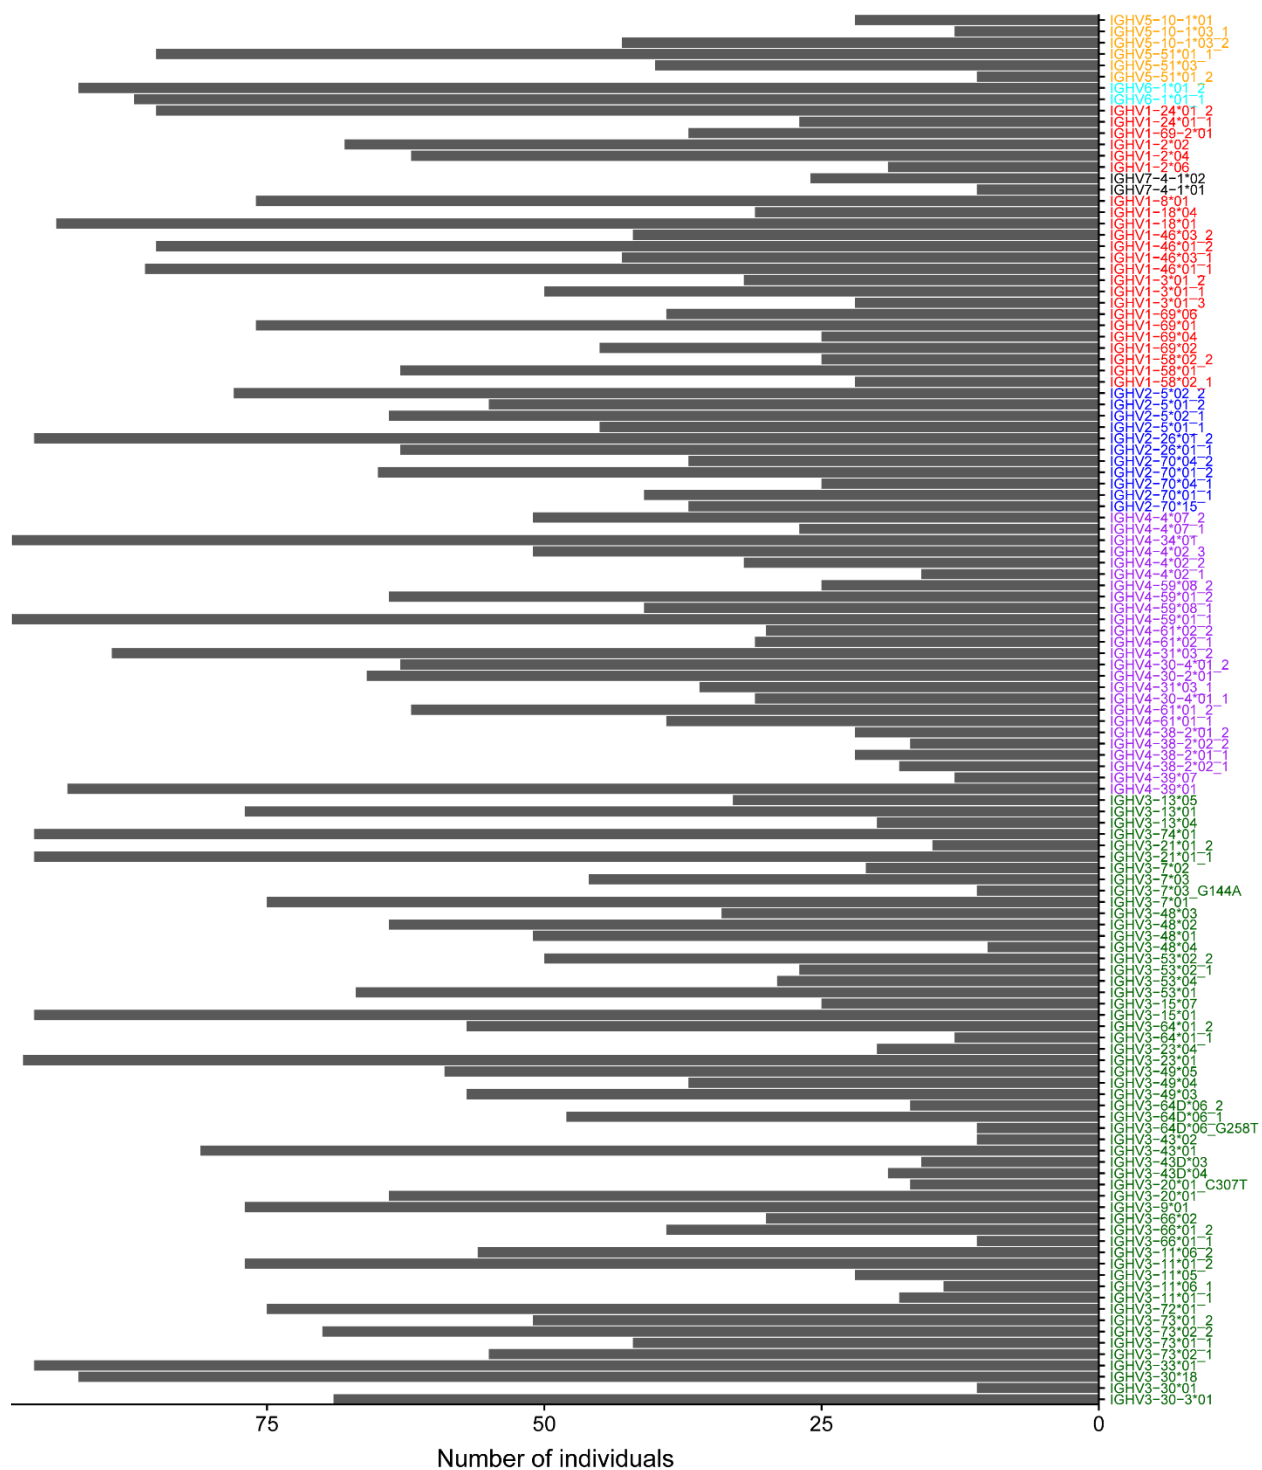

**Supplementary Figure 5. Number of individuals carrying the consensus 5'UTR sequence.** Consensus 5'UTR sequences for each *IGHV* allele across all individuals were gathered and clustered to create a 5'UTR database. The length of each bar (x-axis) is the cluster size for a specific 5'UTR allele (y-axis), i.e. the number of individuals carrying the variant.

a

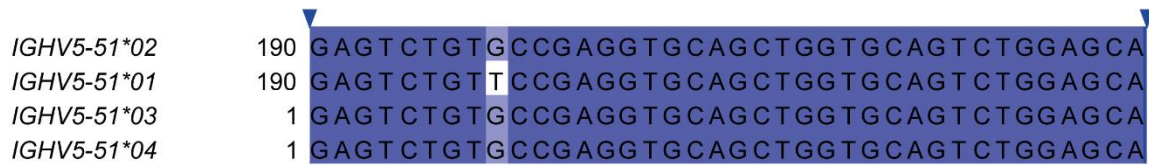

b

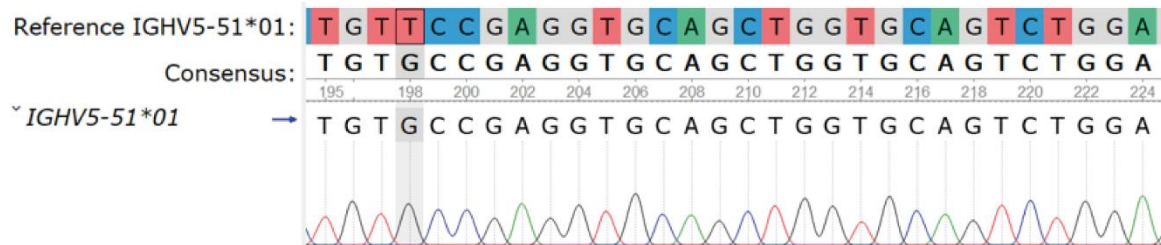

**Supplementary Figure 6. Validation of the *IGHV5-51\*01* leader 2.** The leader 2 part of *IGHV5-51\*01* in all individuals in our cohort differed from the reference in the IMGT database. (a) Alignment of the reference leader 2 sequences of selected *IGHV5-51* alleles. (b) An individual from our cohort homozygous for *IGHV5-51\*01* was selected and *IGHV5-51* was amplified using gene-specific primers (shown in Supplementary Table 1). Sanger sequencing of the amplified product revealed that the leader 2 of *IGHV5-51\*01* indeed differs from the reference.



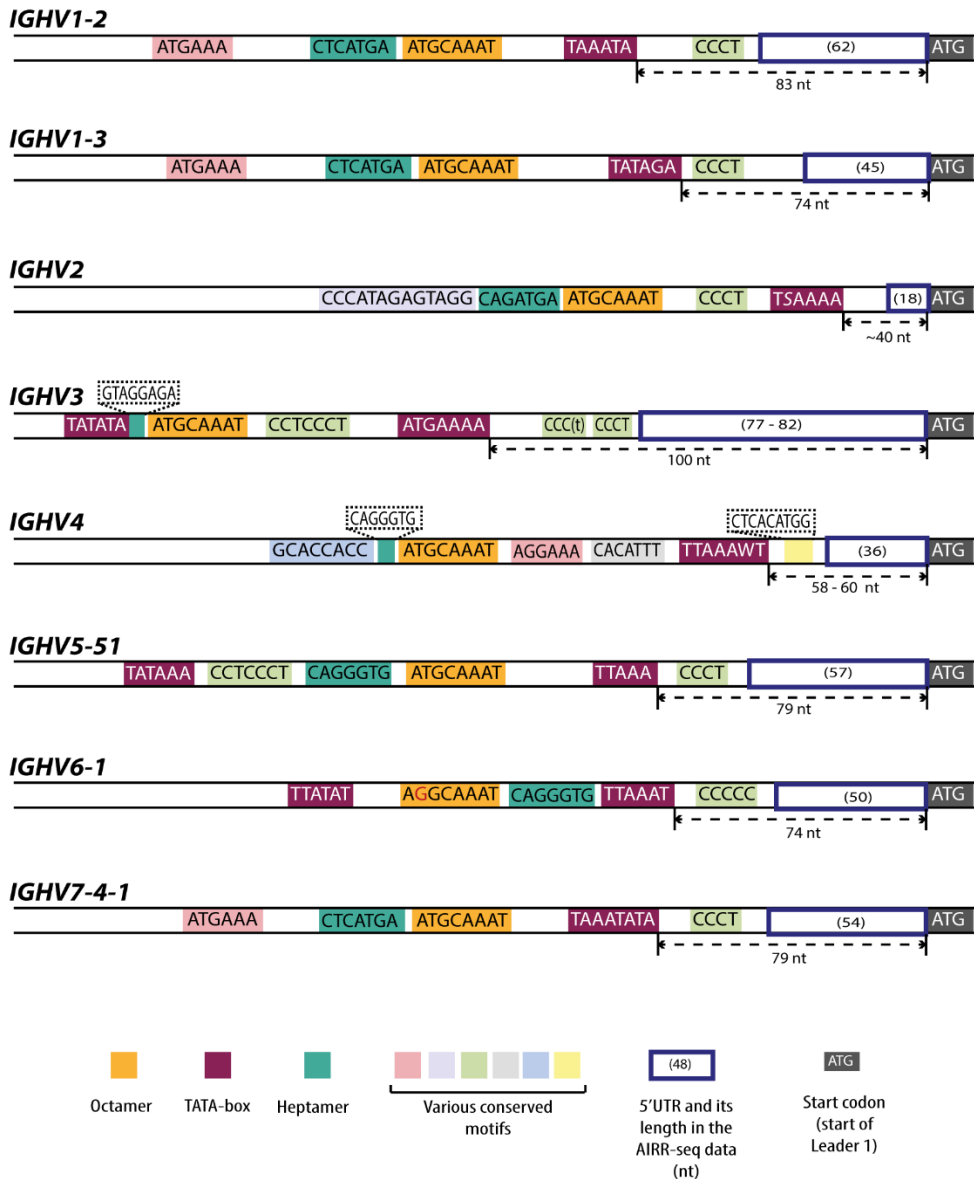

**Supplementary Figure 7. Schematic representation of the *IGHV* promoter regions.** Reference upstream genomic sequences, including the promoter region were retrieved from the IMGT germline database and schematically depicted. Conserved motifs were identified by aligning all available 5'UTR and promoter reference sequences (> 150 nt) by MUSCLE and by searching for regions with high levels of homology. TATA-box sequences (in maroon) of some genes have been previously reported. For the remaining genes, we identified a putative TATA-box by searching for a TA-rich sequence. The octamer (in yellow) is well characterized and highly conserved across all genes. The heptamer (in dark turquoise) was only characterized for *IGHV1* genes. In the other genes, we identified putative heptamers by searching for a conserved sequence upstream of the octamer. Various conserved motifs with unknown function were also identified (pastel colors). The ATG start codon is shown in grey. The 5'UTRs that are found in the AIRR-seq data are lined in dark blue, and their typical length in the repertoire sequencing data is shown in brackets. The length of the 5'UTRs correlated with the distance between the ATG and the TATA-box.

### Supplementary References

1. Giudicelli, V., Chaume, D. & Lefranc, M.-P. IMGT/GENE-DB: a comprehensive database for human and mouse immunoglobulin and T cell receptor genes. *Nucleic Acids Research* **33**, D256-D261 (2005).
2. Okonechnikov, K., Golosova, O., Fursov, M. & the, U.t. Unipro UGENE: a unified bioinformatics toolkit. *Bioinformatics* **28**, 1166-1167 (2012).
3. Vázquez Bernat, N. *et al.* High-quality library preparation for NGS-based immunoglobulin germline gene inference and repertoire expression analysis. *Frontiers in Immunology* **10**(2019).
